# Supplementary material for: Activity and Selectivity of Novel Chemical Metallic Complexes with Potential Anticancer Effects on Melanoma Cells
Source: MDPI journal article supplement (doi:10.3390/molecules28124851), 2023-06-19
Supplement: s1 [file s1]

# Activity and Selectivity of Novel Chemical Metallic Complexes with Potential Anticancer Effects on Melanoma Cells

Maria Camilla Ciardulli <sup>1,†</sup>, Annaluisa Mariconda <sup>2,†</sup>, Marco Sirignano <sup>3</sup>, Erwin Pavel Lamparelli <sup>1</sup>, Raffaele Longo <sup>4</sup>, Pasqualina Scala <sup>1</sup>, Raffaella D'Auria <sup>1</sup>, Antonietta Santoro <sup>1,5</sup>, Liberata Guadagno <sup>4</sup>, Giovanna Della Porta <sup>1,5,\*</sup> and Pasquale Longo <sup>3</sup>

<sup>1</sup> Department of Medicine, Surgery and Dentistry, University of Salerno, Via S. Allende, 84081 Baronissi, Italy; mciardulli@unisa.it (M.C.C.); elamparelli@unisa.it (E.P.L.); pscala@unisa.it (P.S.); radauria@unisa.it (R.D.); ansantoro@unisa.it (A.S.)

<sup>2</sup> Department of Science, University of Basilicata, Viale dell'Ateneo Lucano 10, 85100 Potenza, Italy; annaluisa.mariconda@unibas.it

<sup>3</sup> Department of Chemistry and Biology "Adolfo Zambelli", University of Salerno, Via Giovanni Paolo II, 132 84084 Fisciano, Italy; msirignano@unisa.it (M.S.); plongo@unisa.it (P.L.)

<sup>4</sup> Department of Industrial Engineering, University of Salerno, Via Giovanni Paolo II, 132 84084 Fisciano, Italy; rlongo@unisa.it (R.L.); lguadagno@unisa.it (L.G.)

<sup>5</sup> Interdepartment Centre BIONAM, University of Salerno, Via Giovanni Paolo II, 84084 Fisciano, Italy

\* Correspondence: gdellaporta@unisa.it; Tel.: +39-089965234.

† These authors contributed equally to this work.

---

## List of contents

|                                    |     |
|------------------------------------|-----|
| <sup>1</sup> H-NMR GlyAg.....      | S1  |
| <sup>13</sup> C-NMR GlyAg.....     | S2  |
| MALDI-MS GlyAg .....               | S3  |
| <sup>1</sup> H-NMR PheAg .....     | S4  |
| <sup>13</sup> C-NMR PheAg.....     | S5  |
| MALDI PheAg .....                  | S6  |
| <sup>1</sup> H-NMR AgL20Gly .....  | S7  |
| <sup>13</sup> C-NMR AgL20Gly.....  | S8  |
| MALDI AgL20Gly .....               | S9  |
| <sup>1</sup> H-NMR AgL20Phe .....  | S10 |
| <sup>13</sup> C-NMR AgL20Phe ..... | S11 |
| MALDI AgL20Phe.....                | S12 |
| <sup>1</sup> H-NMR AgM1Gly .....   | S13 |
| <sup>13</sup> C-NMR AgM1Gly .....  | S14 |
| MALDI AgM1Gly.....                 | S15 |
| <sup>1</sup> H-NMR AgM1Phe.....    | S16 |
| <sup>13</sup> C-NMR AgM1Phe .....  | S17 |
| MALDI AgM1Phe.....                 | S18 |
| <sup>1</sup> H-NMR AuL20Gly .....  | S19 |
| <sup>13</sup> C-NMR AuL20Gly ..... | S20 |
| MALDI AuL20Gly.....                | S21 |
| <sup>1</sup> H-NMR AuL20Phe.....   | S22 |
| <sup>13</sup> C-NMR AuL20Phe ..... | S23 |
| MALDI AuL20Phe.....                | S24 |
| <sup>1</sup> H-NMR AuM1Gly .....   | S25 |
| <sup>13</sup> C-NMR AuM1Gly .....  | S26 |
| MALDI AuM1Gly.....                 | S27 |
| <sup>1</sup> H-NMR AuM1Phe.....    | S28 |
| <sup>13</sup> C-NMR AuM1Phe.....   | S29 |
| MALDI AuM1Phe .....                | S30 |

|                                                                |     |
|----------------------------------------------------------------|-----|
| Thermal stability of AgM1Gly .....                             | S34 |
| Hydrolytic Stability of AgM1Gly, AgPhe, AuM1 and AuM1Phe ..... | S35 |
| FT-IR Characterization.....                                    | S31 |
| IC <sub>50</sub> values .....                                  | S38 |

<sup>1</sup>H-NMR GlyAg

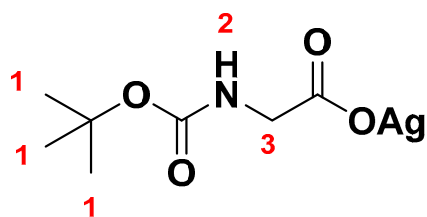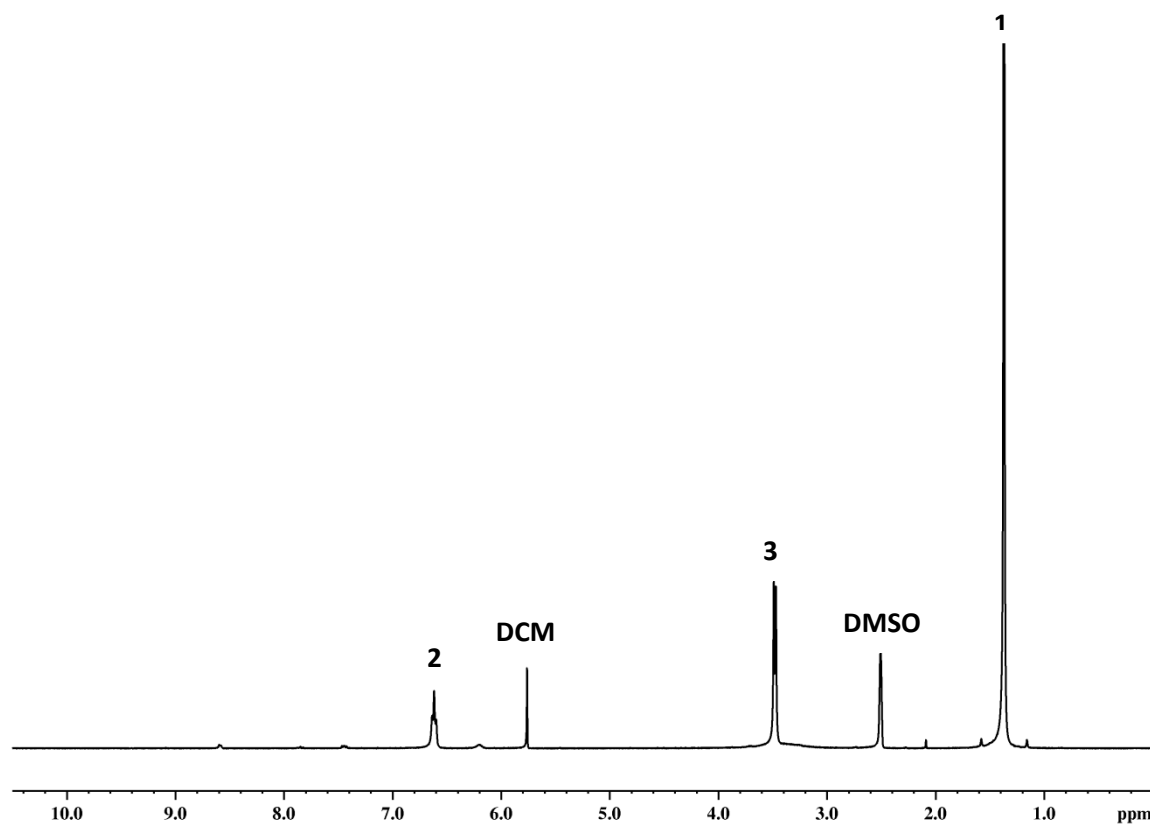

<sup>1</sup>H-NMR (300 MHz, DMSO-d<sub>6</sub>, ppm): δ 6.34 (t,  $J_{vic}$ =5.2 Hz, 1H, NH); 3.41 (d,  $J_{vic}$ =5.2 Hz, 2H, NHCH<sub>2</sub>); 1.36 (s, 9H, C(CH<sub>3</sub>)<sub>3</sub>).

<sup>13</sup>C-NMR GlyAg

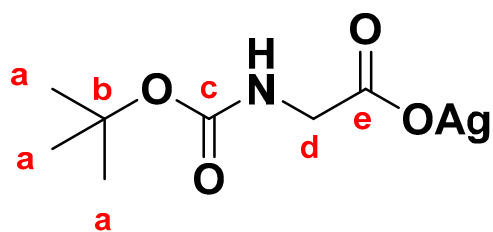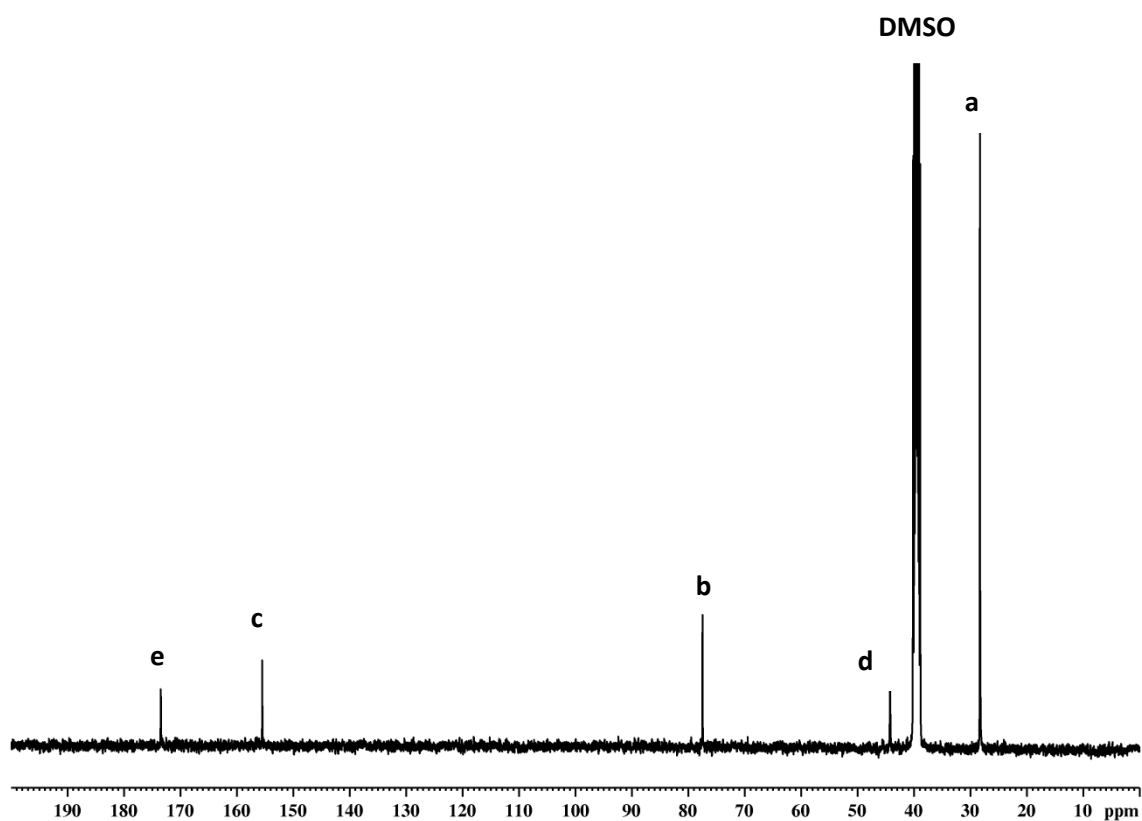

<sup>13</sup>C-NMR (75 MHz, DMSO-d<sub>6</sub> ppm): δ 173.4 (COOAg); 155.4 (NHCO); 77.4 (C(CH<sub>3</sub>)<sub>3</sub>); 44.2 (NHCH<sub>2</sub>); 28.2 (C(CH<sub>3</sub>)<sub>3</sub>).

## MALDI-MS GlyAg

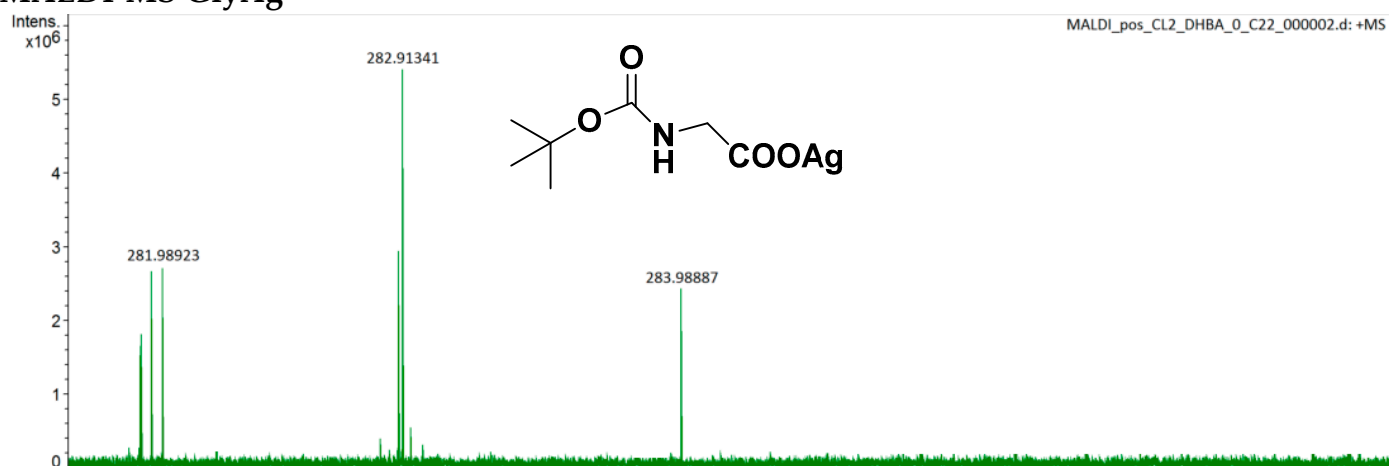

MALDI-MS (m/z): 282.911341 attributable to  $[C_7H_{12}AgNO_4]^+$

Elemental Analysis: theoretical = C: 29.81, H 4.29, Ag 38.25, N 4.97, O 22.69; experimental= C 29.75, H 4.30, Ag 38.30, N 5.00, O 22.66

<sup>1</sup>H-NMR PheAg

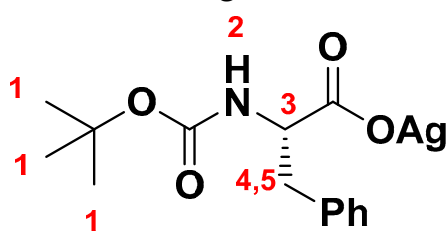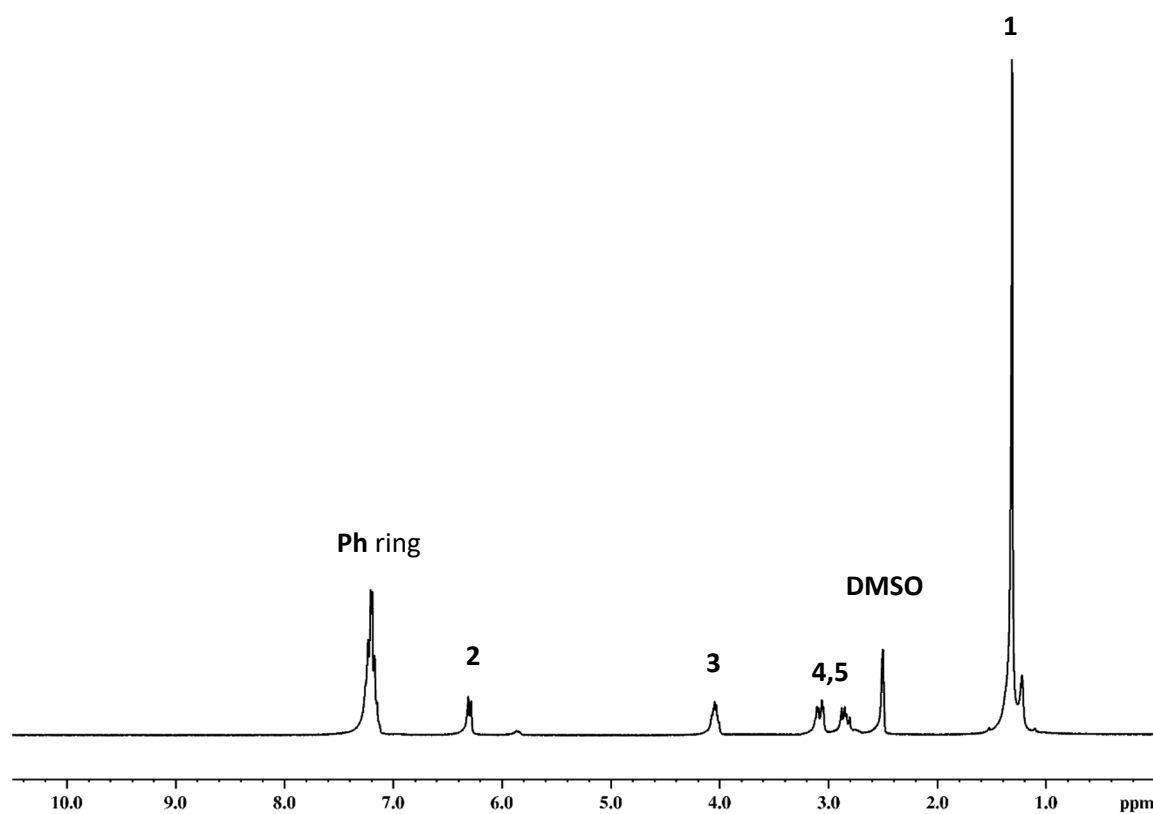

<sup>1</sup>H-NMR (300 MHz DMSO-d<sub>6</sub>, ppm):  $\delta$  7.20 (m, 5H, **Ph** ring); 6.32 (d,  $J_{vic}=8.0$  Hz, 1H, **NH**); 4.05 (m,  $J_{vic}=8.5, 8.1, 4.5$  Hz, 1H, **CH**); 3.10 (dd,  $J_{gem}=14.0$  Hz,  $J_{vic}=8.5$  Hz, 1H, **CH<sub>2</sub>Ph**); 2.86 (dd,  $J_{gem}=14.0, J_{vic}=8.1$  Hz 1H, **CH<sub>2</sub>Ph**); 1.31 (s, 9H, C(**CH<sub>3</sub>**)<sub>3</sub>).

<sup>13</sup>C-NMR PheAg

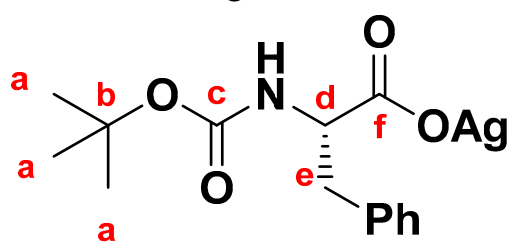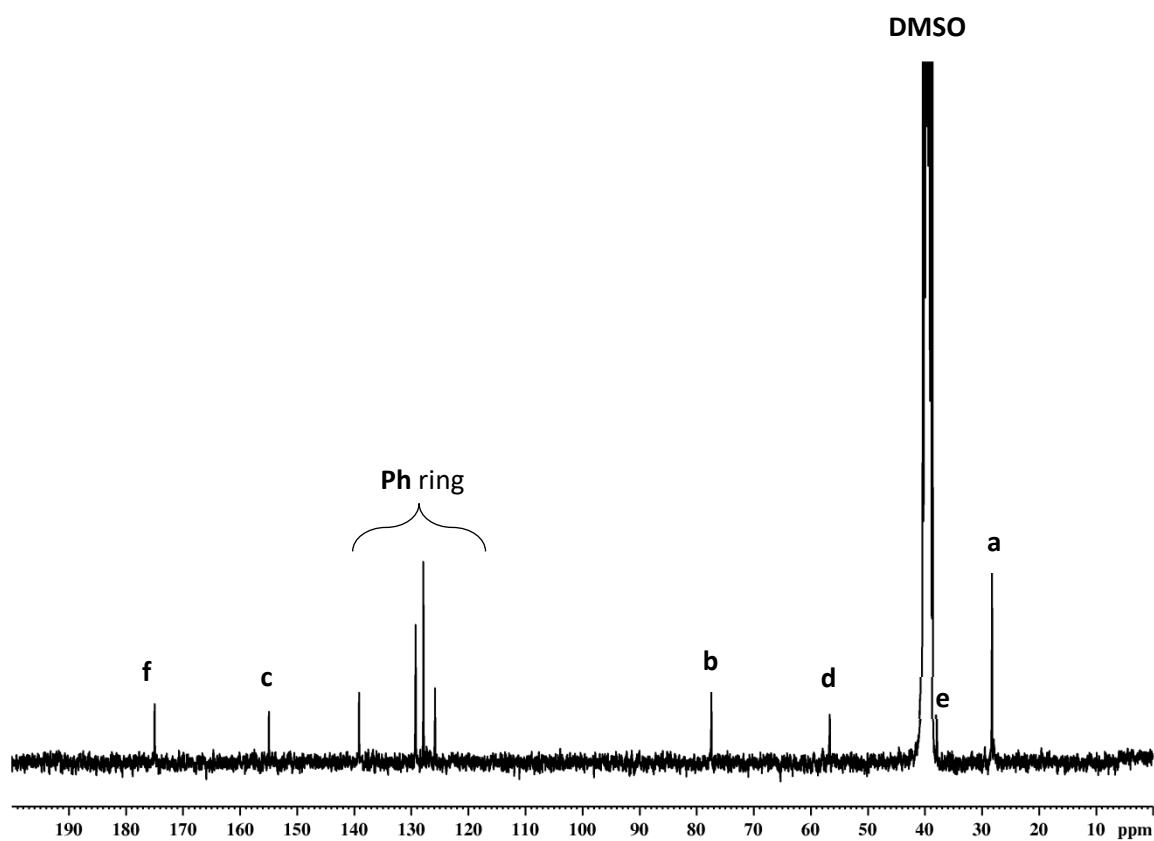

<sup>13</sup>C-NMR (100 MHz DMSO-d<sub>6</sub>, ppm): δ 174.9 (COOAg); 154.9 (NHCO); 139.1, 129.2, 127.8, 125.8 (Ph ring); 77.4 (C(CH<sub>3</sub>)<sub>3</sub>); 56.6 (NHCH); 36.4 (PhCH<sub>2</sub>); 28.2 (C(CH<sub>3</sub>)<sub>3</sub>).



## MALDI PheAg

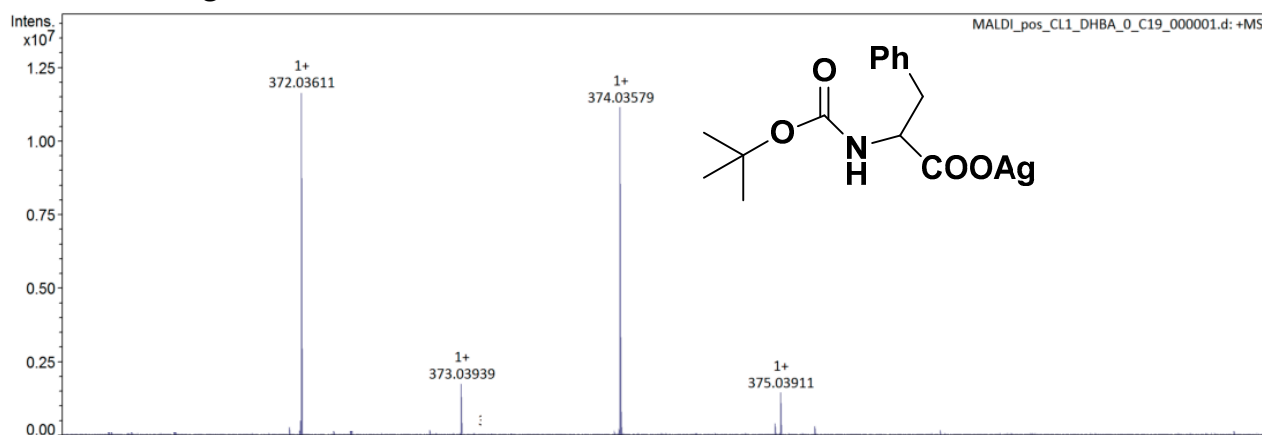

MALDI-MS (**m/z**): 372.03611 attributable to [C<sub>14</sub>H<sub>18</sub>AgNO<sub>4</sub>]<sup>+</sup>

Elemental Analysis: theoretical = C: 45.15, H 4.83, Ag 29.06, N 3.76, O 17.20; experimental= C 45.10, H 4.88, Ag 29.10, N 3.80, O 17.12

<sup>1</sup>H-NMR AgL20Gly

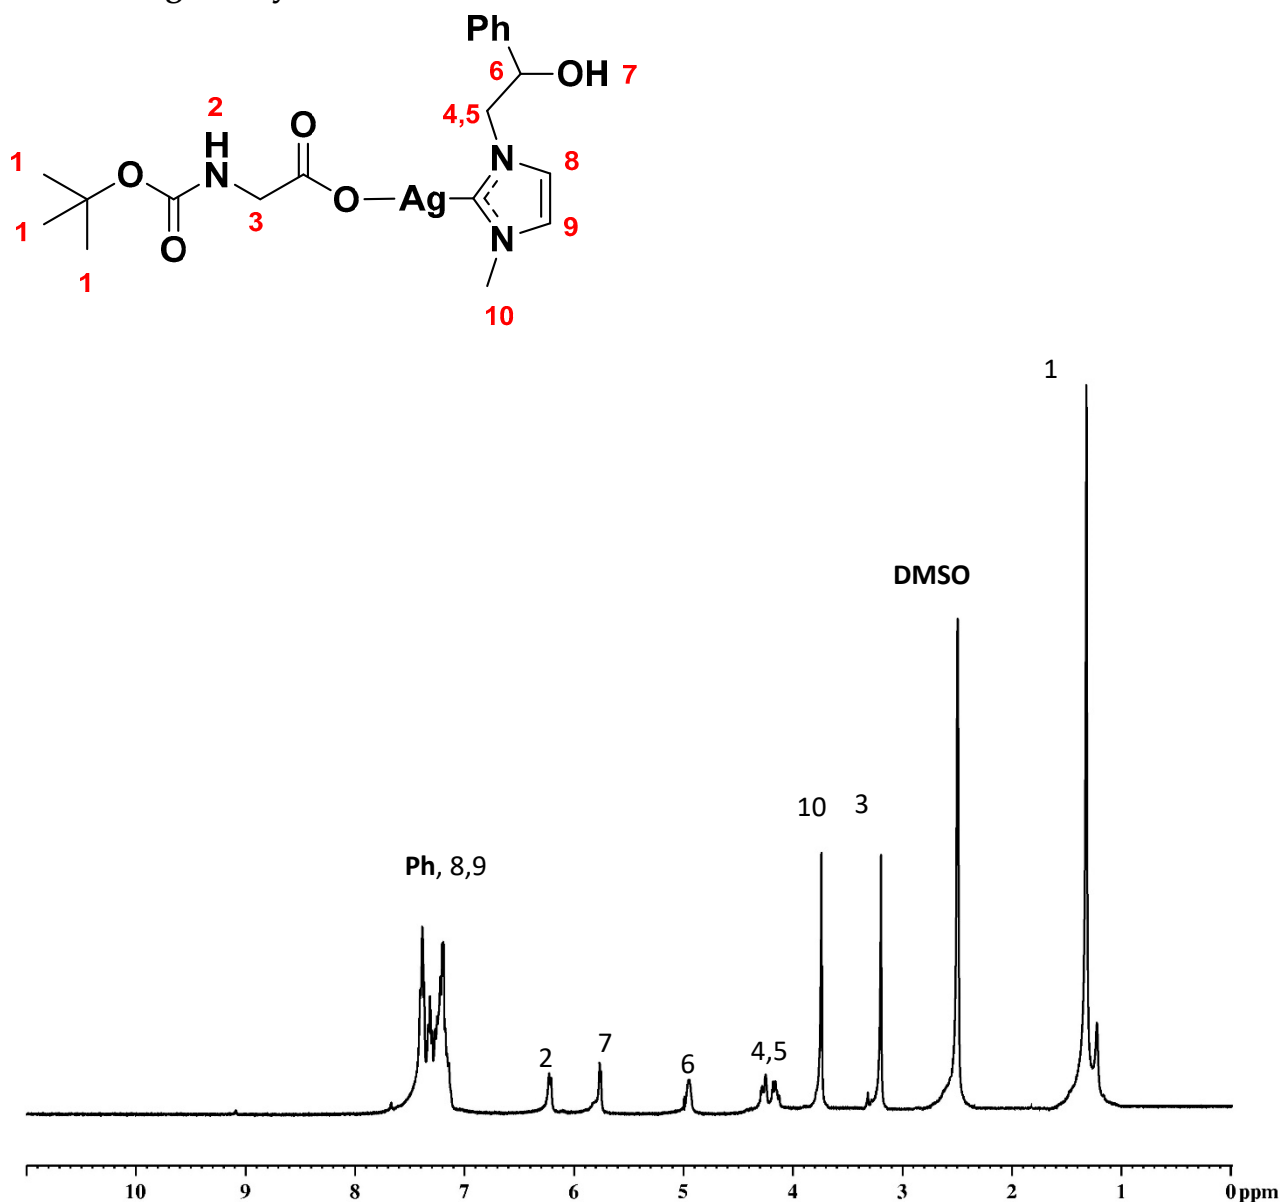

<sup>1</sup>H-NMR (400 MHz, DMSO-d<sub>6</sub>, ppm): δ 7.35-7.33 (m, 7H, C<sub>6</sub>H<sub>5</sub>CH(OH)CH<sub>2</sub>NCHCHN); 6.37 (t, *J*<sub>vic</sub>=5.0 Hz, 1H, Gly: NH); 5.85 (d, 1H, C<sub>6</sub>H<sub>5</sub>CH(OH)CH<sub>2</sub>N), 5.01 (m, *J*<sub>vic</sub>=10.3, 8.4 Hz, 1H, C<sub>6</sub>H<sub>5</sub>CH(OH)CH<sub>2</sub>N); 4.41 (m, *J*<sub>gem</sub>=15.0 Hz, *J*<sub>vic</sub>=10.3, 8.4 Hz, 2H, C<sub>6</sub>H<sub>5</sub>CH(OH)CH<sub>2</sub>N); 3.90 (s, 3H, NCH<sub>3</sub>); 3.51 (d, *J*<sub>gem</sub>=11.0 Hz, *J*<sub>vic</sub>=5.0 Hz, 2H, Gly: NHCH<sub>2</sub>); 1.29 (s, 9H, Gly: C(CH<sub>3</sub>)<sub>3</sub>).

[illegible]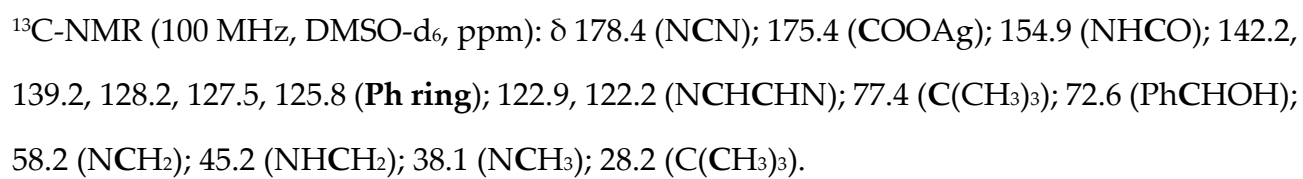

## MALDI AgL20Gly

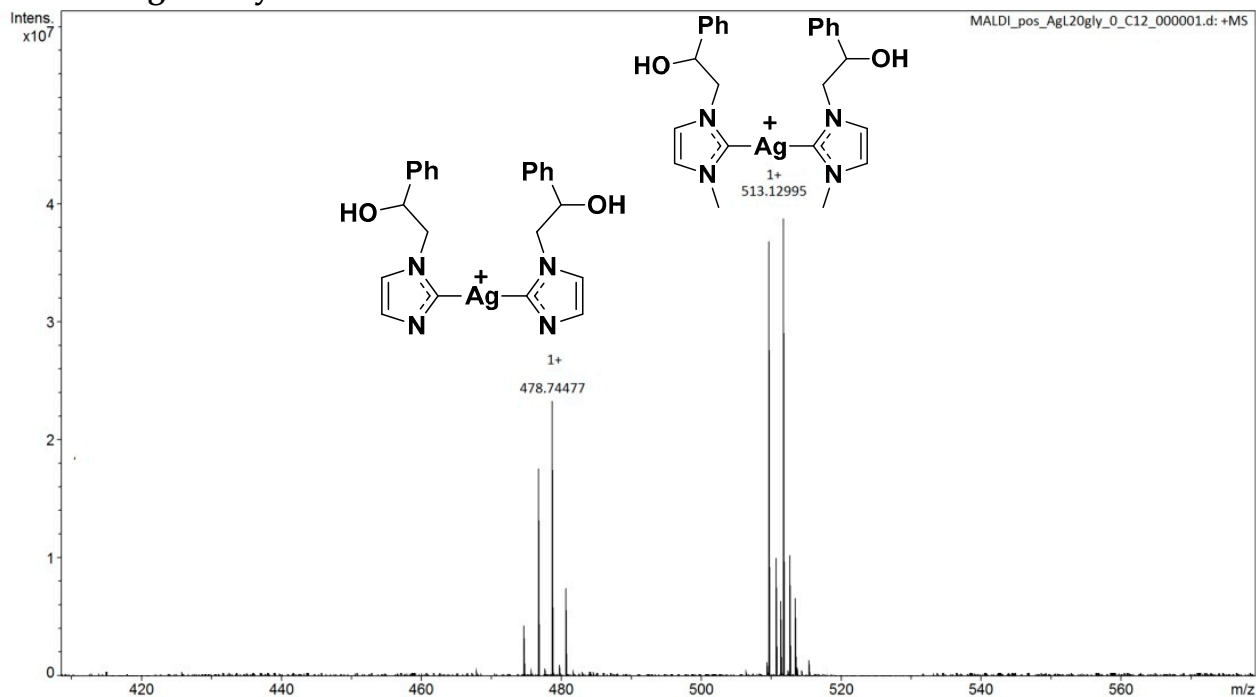

MALDI-MS (m/z): 513.12995 attributable to bis-carbene structure  $[\text{C}_{24}\text{H}_{28}\text{AgN}_4\text{O}_2]^+$  and 478.74477 attributable to  $[\text{C}_{22}\text{H}_{22}\text{AgN}_4\text{O}_2]^+$

Elemental Analysis: theoretical = C: 47.12, H 5.41, Ag 22.27, N 8.68, O 16.52; experimental= C 47.08, H 5.45, Ag 22.17, N 8.78, O 16.52

<sup>1</sup>H-NMR AgL20Phe

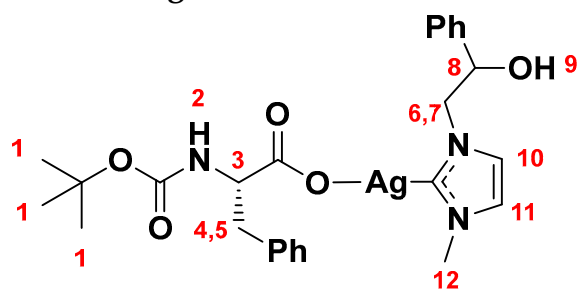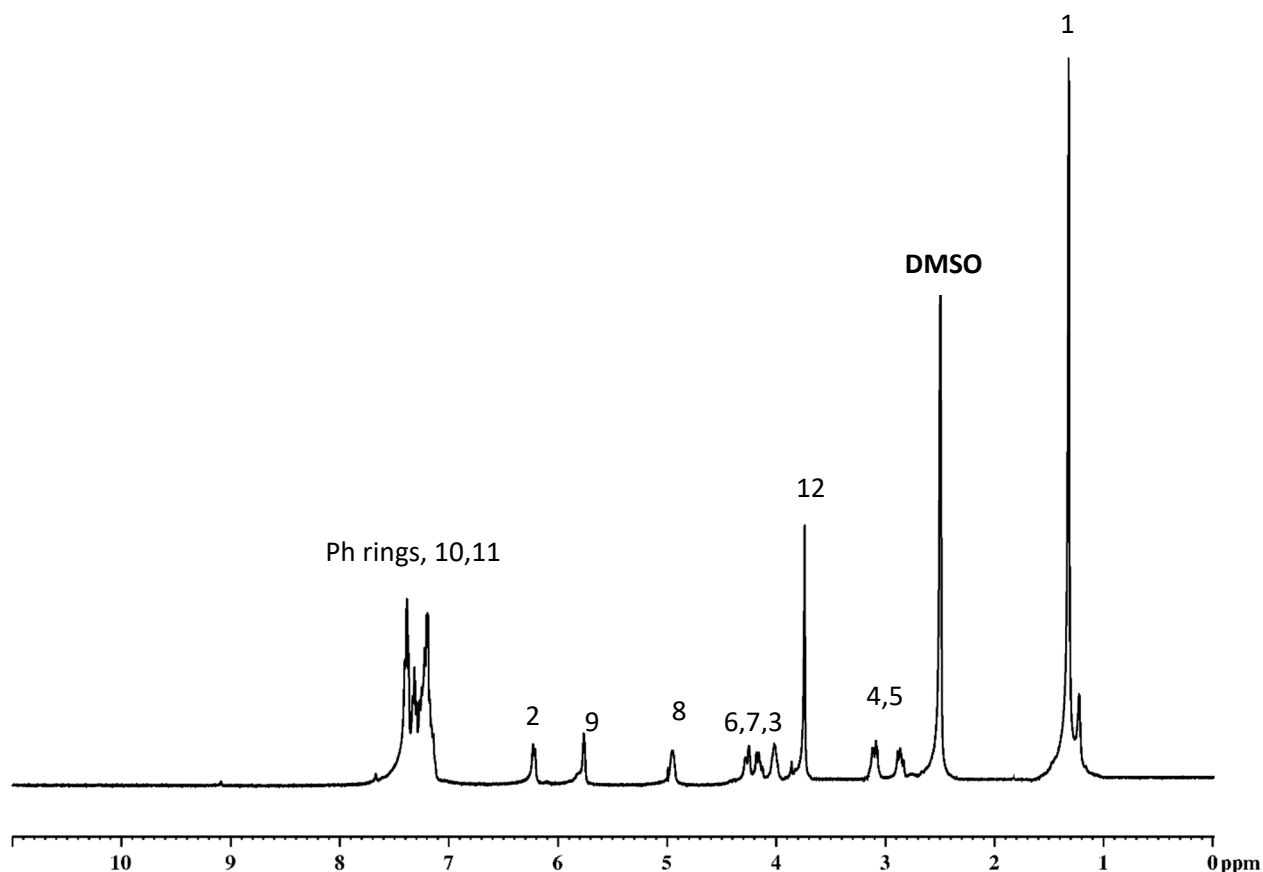

<sup>1</sup>H-NMR (400 MHz, DMSO-d<sub>6</sub>, ppm): δ 7.40-7.17 (m, 12 H, C<sub>6</sub>H<sub>5</sub>CH(OH)CH<sub>2</sub>NCHCHN+Phe:C<sub>6</sub>H<sub>5</sub>); 6.20 (t, J<sub>vic</sub>=8.0 Hz, 1H, Phe: NH); 5.77 (d, 1H, C<sub>6</sub>H<sub>5</sub>CH(OH)CH<sub>2</sub>N); 4.95 (m, J<sub>vic</sub>=10.5, 8.7 Hz, 1H, C<sub>6</sub>H<sub>5</sub>CH(OH)CH<sub>2</sub>N); 4.26, 4.16 (dd, J<sub>gem</sub>=15.6 Hz, J<sub>vic</sub>=10.5, 8.7 Hz, 2H, C<sub>6</sub>H<sub>5</sub>CH(OH)CH<sub>2</sub>N); 4.01 (dd, J<sub>vic</sub>=9.0, 8.5 Hz, 1H, Phe: CHCH<sub>2</sub>Ph); 3.74 (s, 3H, NCH<sub>3</sub>); 3.09, 2.88 (dd, J<sub>gem</sub>=14.0 Hz, J<sub>vic</sub>=9.0, 8.5 Hz, 2H, Phe: CHCH<sub>2</sub>Ph); 1.39 (s, 9H, Phe: C(CH<sub>3</sub>)<sub>3</sub>).

<sup>13</sup>C-NMR AgL20Phe

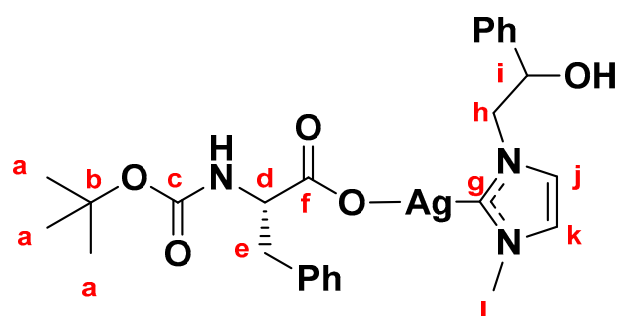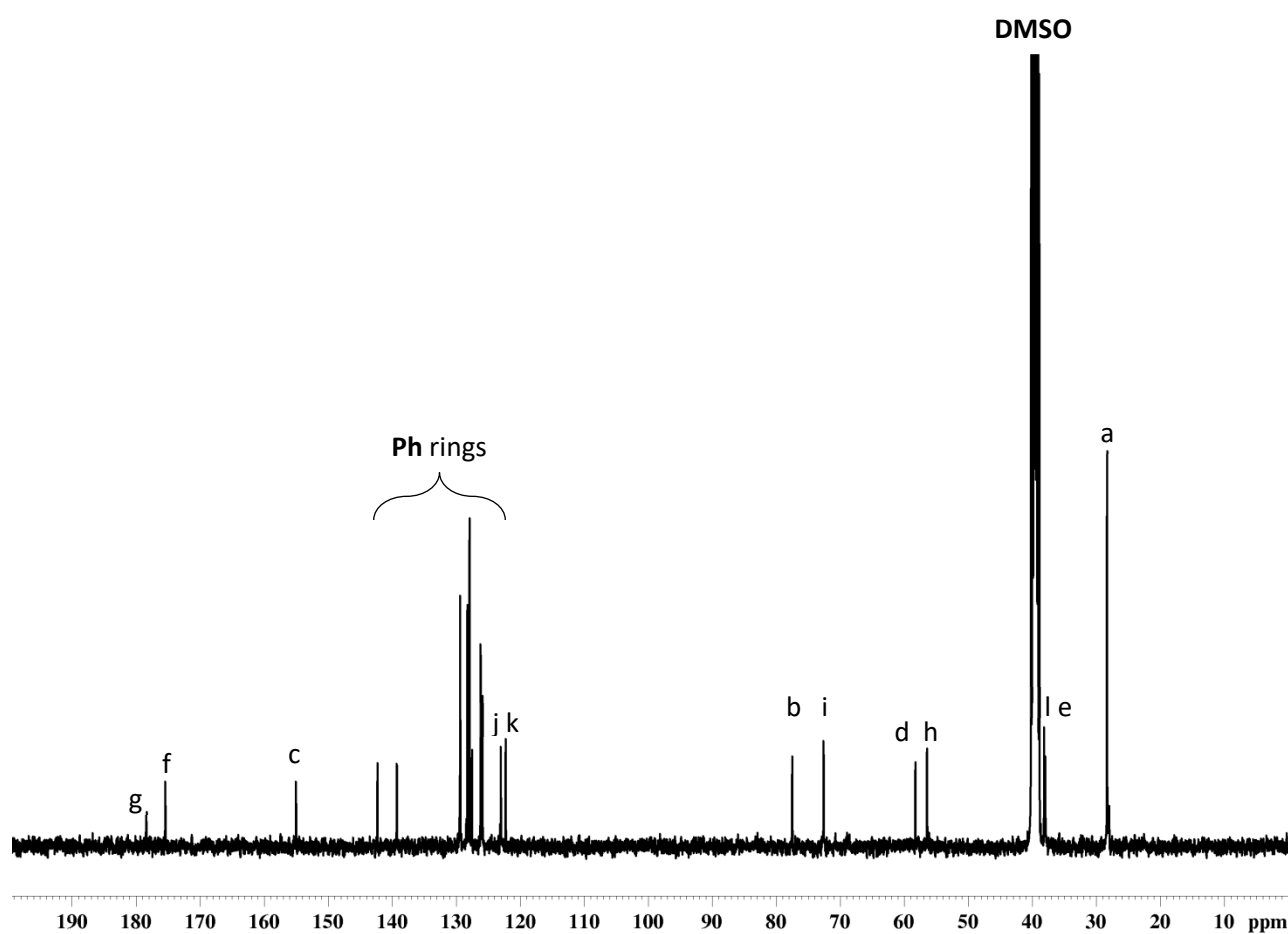

<sup>13</sup>C-NMR (100 MHz, DMSO-d<sub>6</sub>, ppm): δ 178.4 (NCN); 175.4 (COOAg); 154.9 (NHCO); 142.2; 139.2, 129.3, 128.2, 127.8, 127.5, 126.1, 125.8 (**Ph** rings); 124.2, 122.9 (NCHCHN); 77.4 (C(CH<sub>3</sub>)<sub>3</sub>); 72.5 (PhCHOH); 58.2 (NCH<sub>2</sub>); 56.4 (NHCH); 38.1 (NCH<sub>3</sub>); 37.9 (CHCH<sub>2</sub>Ph); 28.3(C(CH<sub>3</sub>)<sub>3</sub>).

## MALDI AgL20Phe

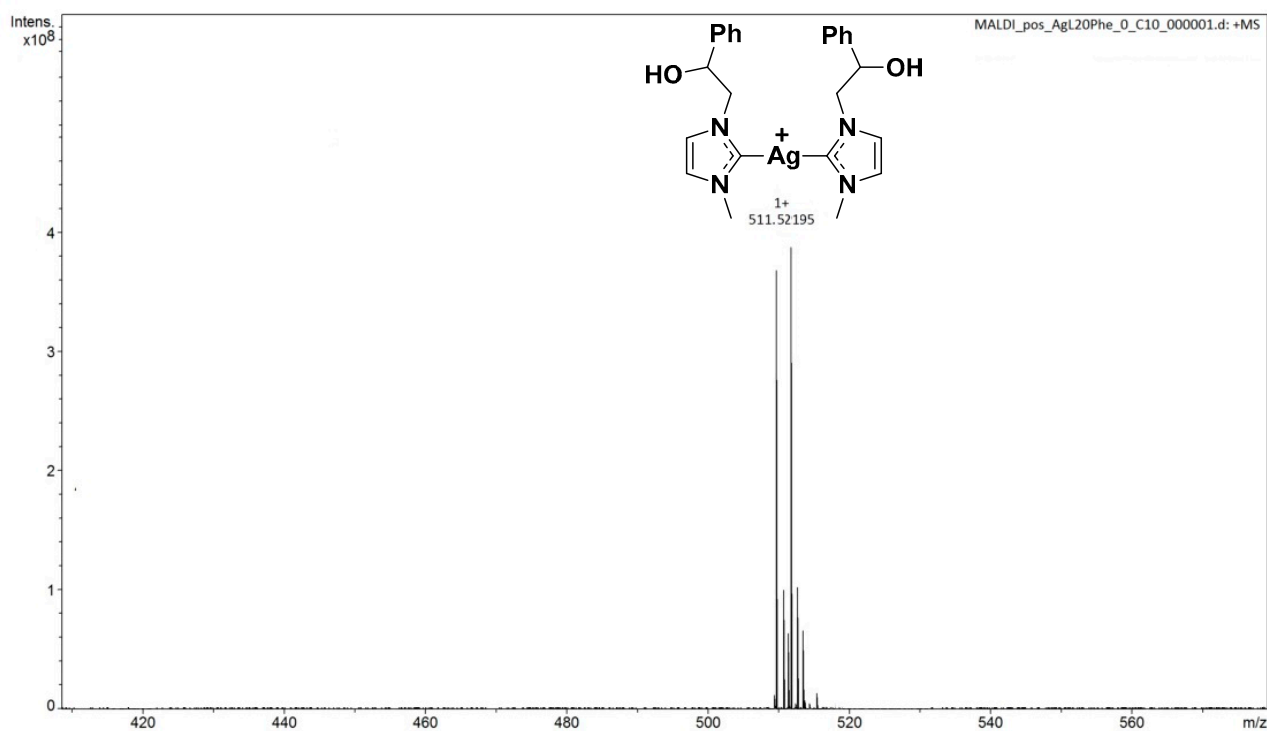

MALDI-MS (m/z): 511.52195 attributable to bis-carbene structure  $[\text{C}_{24}\text{H}_{28}\text{AgN}_4\text{O}_2]^+$

Elemental Analysis: theoretical = C: 54.36, H 5.62, Ag 18.78, N 7.32, O 13.92; experimental = C 54.30, H 5.68, Ag 18.75, N 7.35, O 13.92

<sup>1</sup>H-NMR AgM1Gly

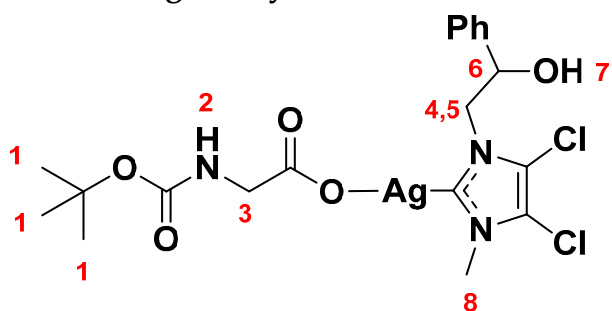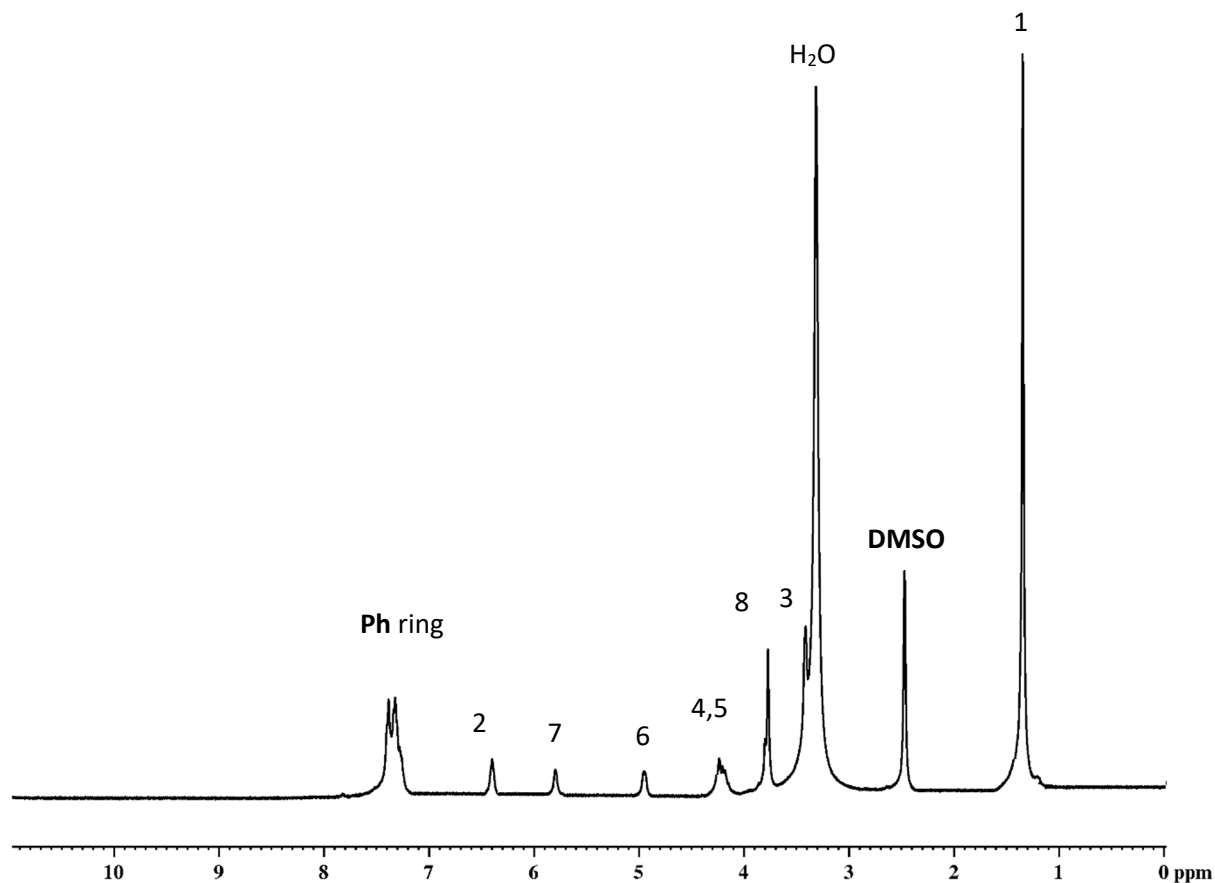

<sup>1</sup>H-NMR (400 MHz, DMSO-d<sub>6</sub>, ppm):  $\delta$  7.37-7.35 (m, 5H, C<sub>6</sub>H<sub>5</sub>CH(OH)CH<sub>2</sub>N); 6.34 (t,  $J_{vic}$ =5.6 Hz, 1H, Gly: NH); 5.97 (s, 1H, C<sub>6</sub>H<sub>5</sub>CH(OH)CH<sub>2</sub>N); 4.97 (m,  $J_{vic}$ = 10.7, 8.6 Hz, 1H, C<sub>6</sub>H<sub>5</sub>CH(OH)CH<sub>2</sub>N); 4.25 (m,  $J_{gem}$ =13.8 Hz,  $J_{vic}$ =10.7, 8.6 Hz, 2H, C<sub>6</sub>H<sub>5</sub>CH(OH)CH<sub>2</sub>N); 3.81 (s, 3H, NCH<sub>3</sub>); 3.25 (s, 2H, Gly: NHCH<sub>2</sub>); 1.36 (s, 9H, Gly: C(CH<sub>3</sub>)<sub>3</sub>).



<sup>13</sup>C-NMR AgM1Gly

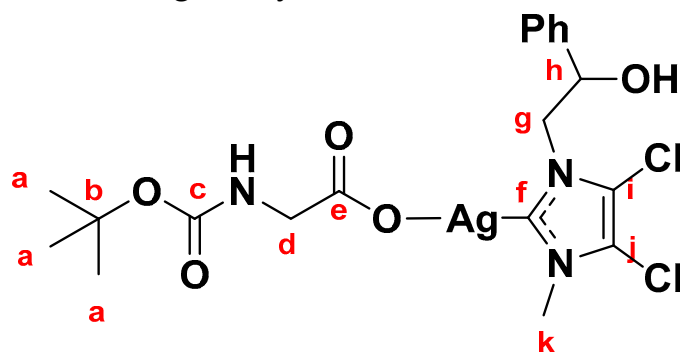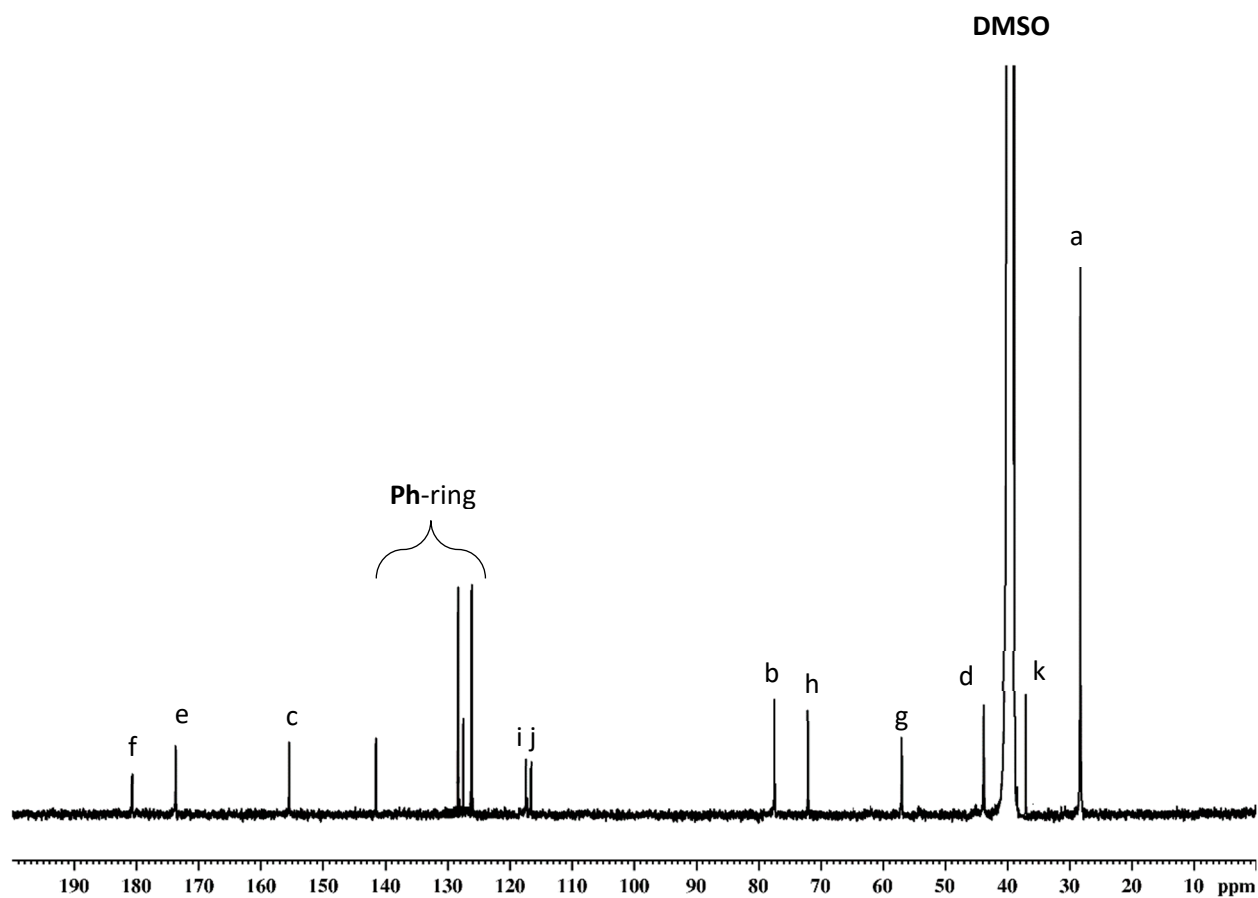

<sup>13</sup>C-NMR (100 MHz, DMSO-d<sub>6</sub>, ppm): δ: 180.7 (NCN); 173.7 (COOAg); 155.4 (NHCO); 141.5, 128.8, 127.7, 126.1 (**Ph** ring); 117.4, 116.5 (NCClCClN); 77.4 (C(CH<sub>3</sub>)<sub>3</sub>); 72.0 (CHOH); 56.9 (NCH<sub>2</sub>); 43.7 (NHCH<sub>2</sub>); 37.6 (NCH<sub>3</sub>); 28.2 (C(CH<sub>3</sub>)<sub>3</sub>).

## MALDI AgM1Gly

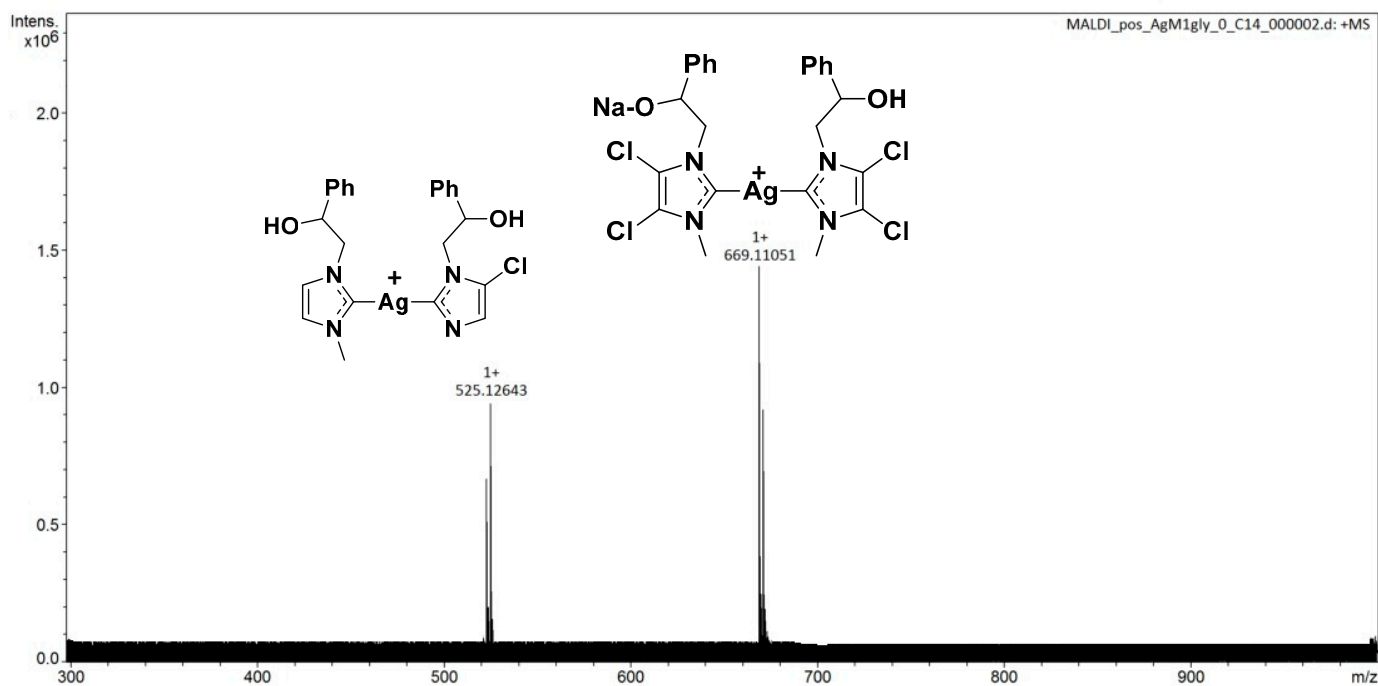

MALDI-MS ( $m/z$ ): 669.11051 attributable to bis-carbene structure  $[\text{C}_{24}\text{H}_{23}\text{AgCl}_4\text{N}_4\text{NaO}_2]^+$  and 525.12643 attributable to  $[\text{C}_{23}\text{H}_{21}\text{AgClN}_4\text{O}_2]^+$

Elemental Analysis: theoretical = C: 41.25, H 4.37, Ag 19.50, Cl 12.82, N 7.60, O 14.46;  
experimental= C 41.22, H 4.31, Ag 19.49, Cl 12.82, N 7.70, O 14.46

<sup>1</sup>H-NMR AgM1Phe

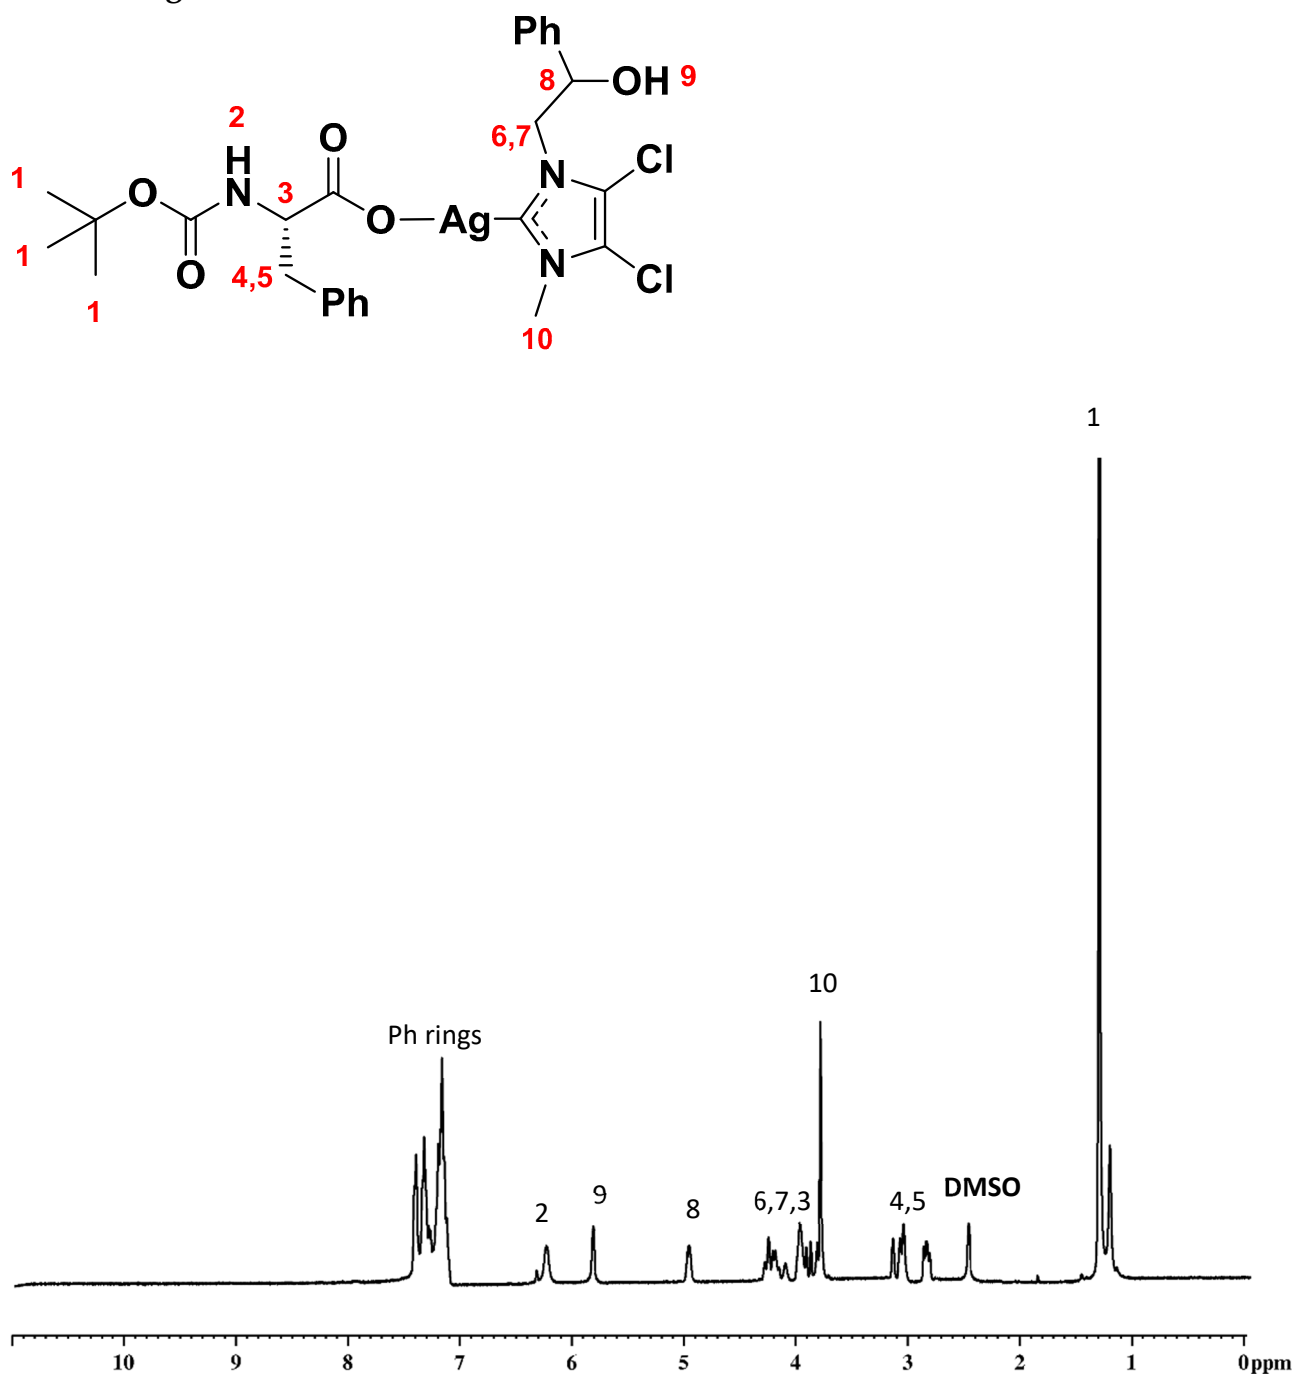

<sup>1</sup>H-NMR (400 MHz, DMSO-d<sub>6</sub>, ppm): δ 7.43-7.20 (m, 10H, C<sub>6</sub>H<sub>5</sub>CH(OH)CH<sub>2</sub>N+Phe:C<sub>6</sub>H<sub>5</sub>); 6.30 (m, *J*<sub>vic</sub>=8.6 Hz, 1H, Phe: NH); 5.84 (d, 1H, C<sub>6</sub>H<sub>5</sub>CH(OH)CH<sub>2</sub>N); 4.99 (m, *J*<sub>vic</sub>=10.8, 8.6 Hz, 1H, C<sub>6</sub>H<sub>5</sub>CH(OH)CH<sub>2</sub>N); 4.27 (m, 2H, C<sub>6</sub>H<sub>5</sub>CH(OH)CH<sub>2</sub>N); 4.04 (m, 1H, Phe: CHCH<sub>2</sub>Ph); 3.80 (s, 3H, NCH<sub>3</sub>); 3.11-2.87 (dd, 2H, Phe: CHCH<sub>2</sub>Ph); 1.31 (s, 9H, Phe: C(CH<sub>3</sub>)<sub>3</sub>).

<sup>13</sup>C-NMR AgM1Phe

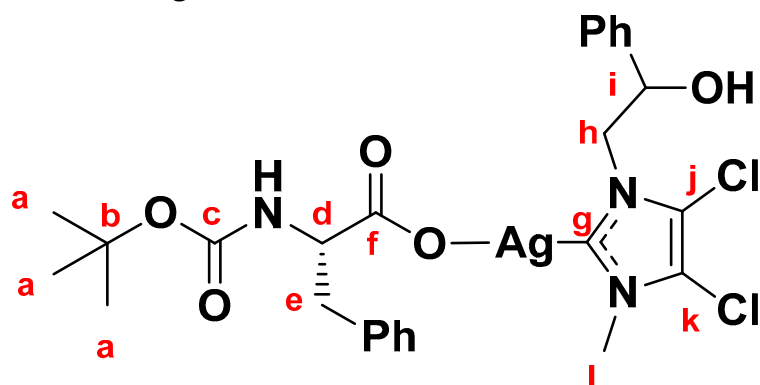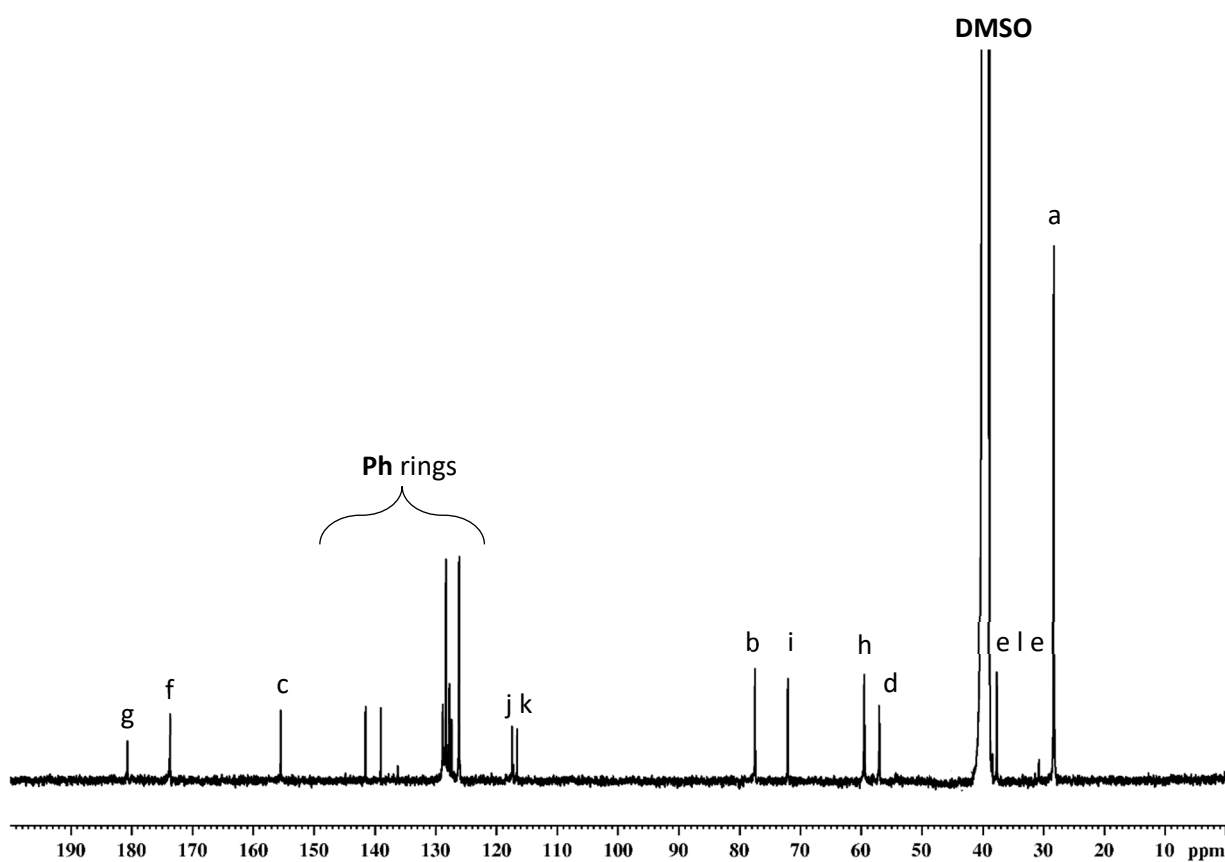

<sup>13</sup>C-NMR (100 MHz, DMSO-d<sub>6</sub>, ppm): δ 180.7 (NCN); 175.3 (COOAg); 155.0 (NHCO); 141.5, 139.0, 129.2, 128.8, 128.3, 127.9, 126.1, 125.9 (**Ph** rings); 117.4, 116.6 (NCClCCIN); 77.4 (C(CH<sub>3</sub>)<sub>3</sub>); 72.8 (CHOH); 57.0 (NCH<sub>2</sub>); 56.2 (CHNH); 37.7 (NCH<sub>3</sub>); 37.0 (CH<sub>2</sub>Ph); 28.1 (C(CH<sub>3</sub>)<sub>3</sub>).

## MALDI AgM1Phe

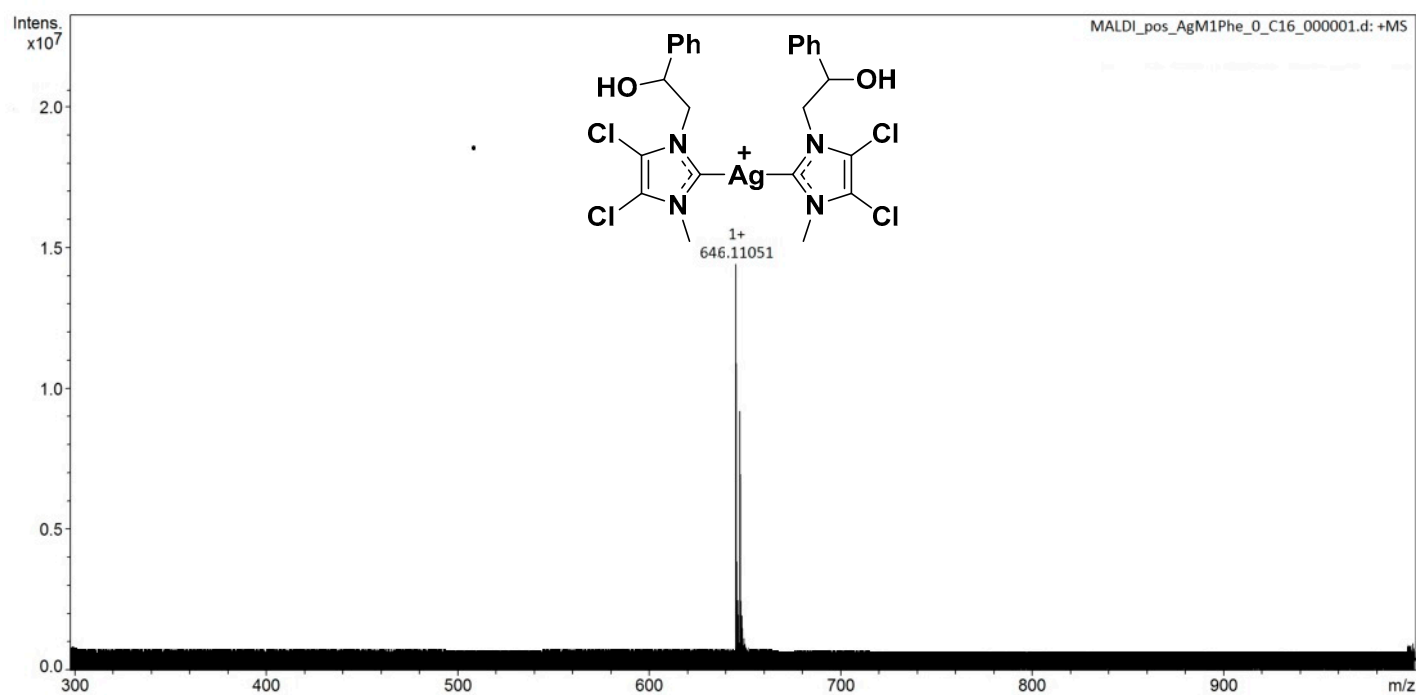

MALDI-MS (m/z): 646.11051 attributable to bis-carbene structure  $[\text{C}_{24}\text{H}_{24}\text{AgCl}_4\text{N}_4\text{O}_2]^+$

Elemental Analysis: theoretical = C: 48.54, H 4.70, Ag 16.77, Cl 11.02, N 6.53, O 12.43;

experimental= C 48.55, H 4.80, Ag 16.71, Cl 11.02, N 6.55, O 12.37

$[\alpha]_D^{25} (C = 0.37)$ : -99.86

<sup>1</sup>H-NMR AuL20Gly

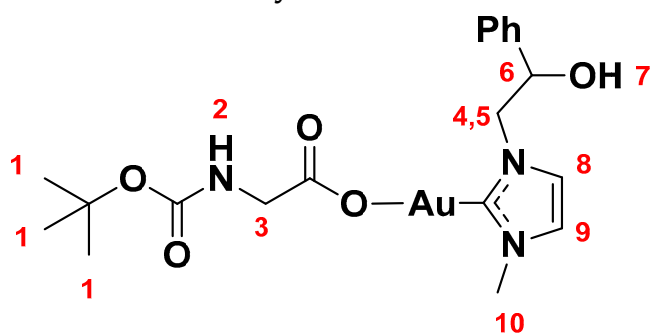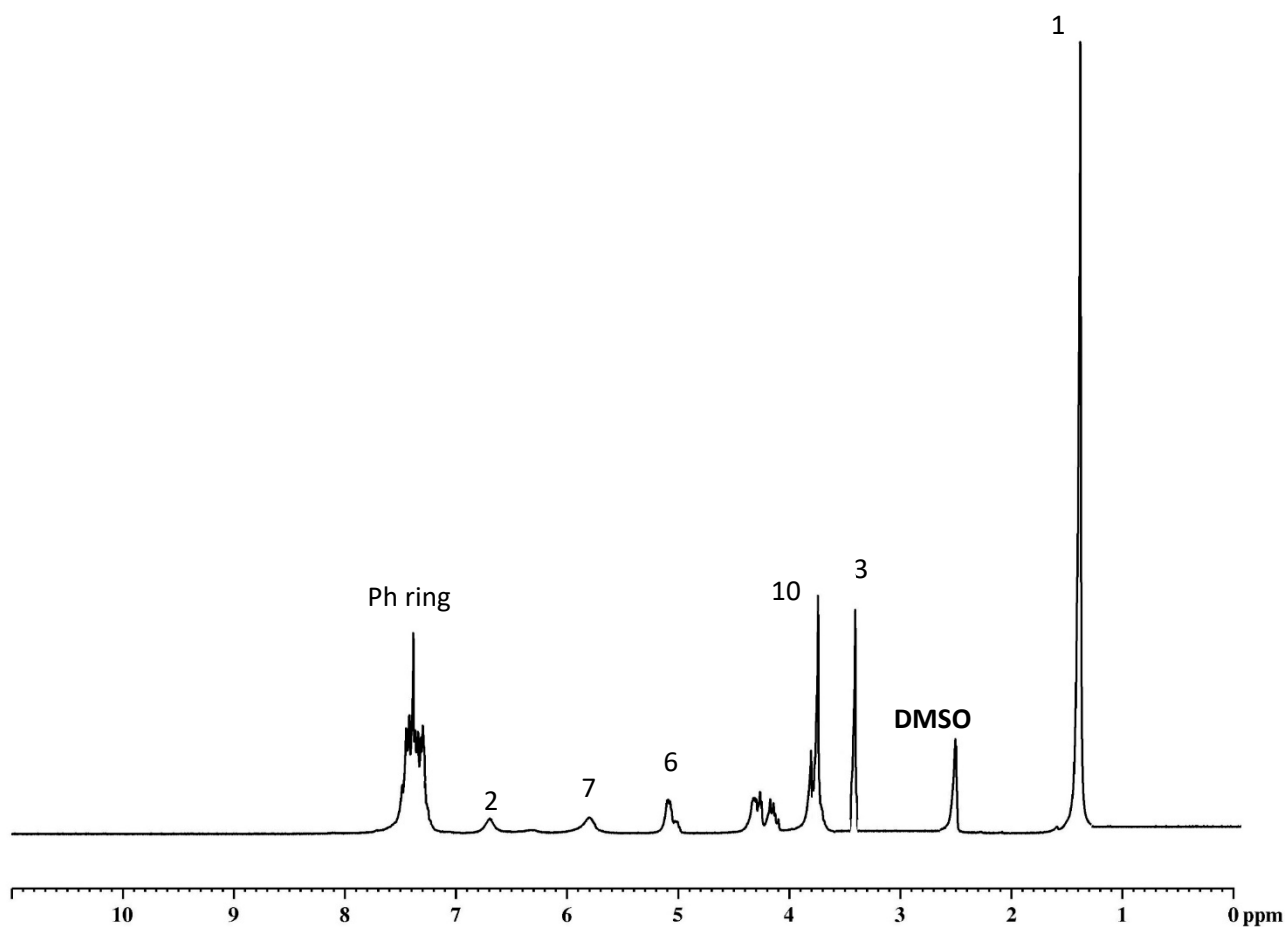

<sup>1</sup>H-NMR (400 MHz, DMSO-d<sub>6</sub>, ppm):  $\delta$  7.35-7.33, (m, 7H, C<sub>6</sub>H<sub>5</sub>CH(OH)CH<sub>2</sub>NCHCHN); 6.87 (br, 1H, Gly: NH); 5.85 (br, 1H, C<sub>6</sub>H<sub>5</sub>CH(OH)CH<sub>2</sub>N), 5.01 (m, 1H, C<sub>6</sub>H<sub>5</sub>CH(OH)CH<sub>2</sub>N); 4.41 (m 2H, C<sub>6</sub>H<sub>5</sub>CH(OH)CH<sub>2</sub>N); 3.90 (s, 3H, NCH<sub>3</sub>); 3.51 (d,  $J_{gem}$ =11.0 Hz,  $J_{vic}$ =5.0 Hz, 2H, Gly: NHCH<sub>2</sub>); 1.29 (s, 9H, Gly: C(CH<sub>3</sub>)<sub>3</sub>).

<sup>13</sup>C-NMR AuL20Gly

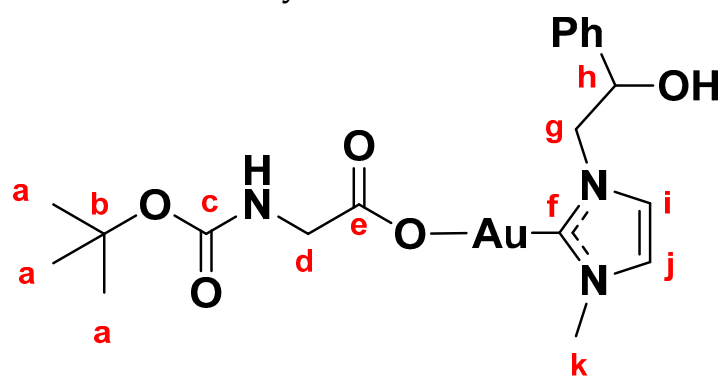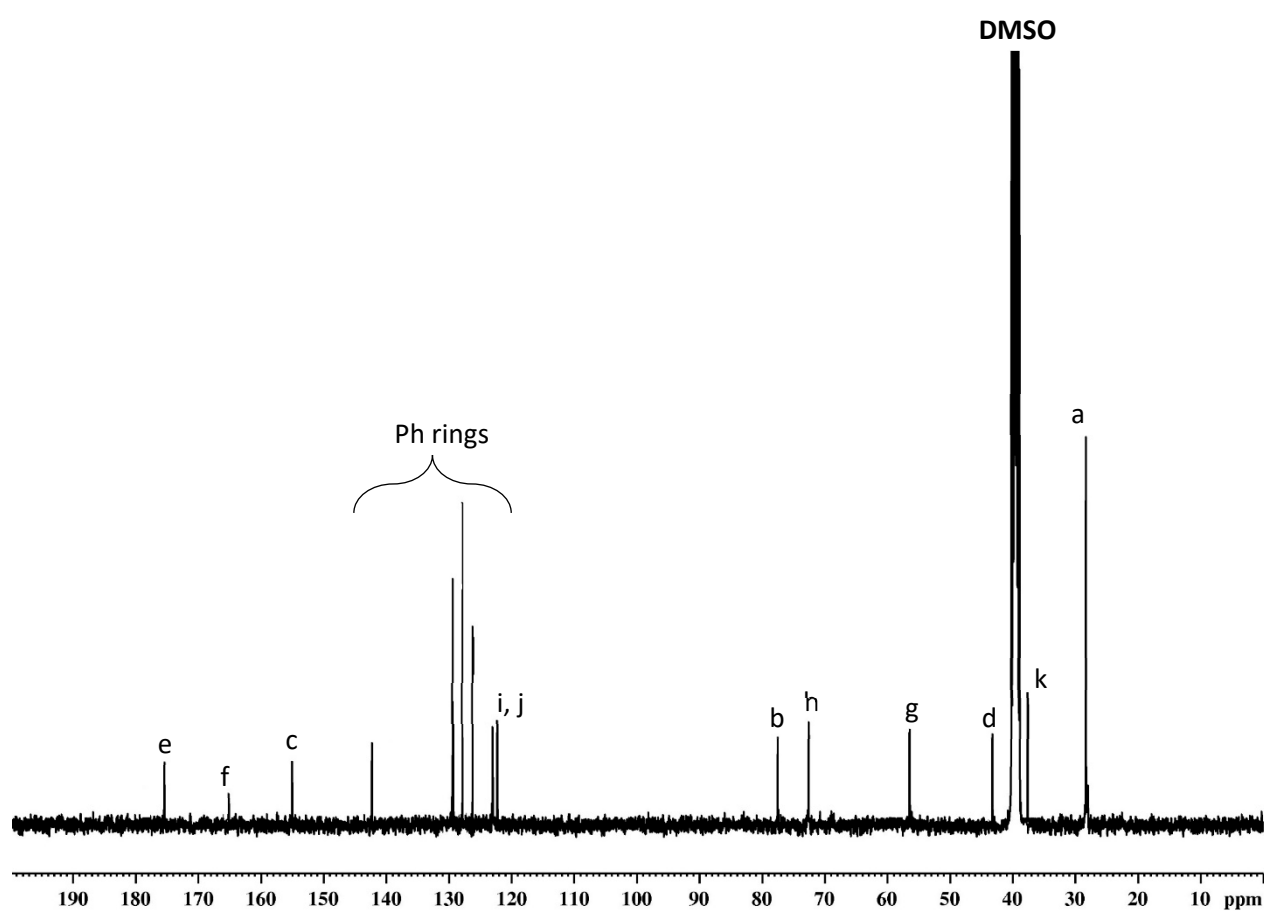

<sup>13</sup>C-NMR (100 MHz, DMSO-d<sub>6</sub>, ppm): δ 175.4 (COOAu); 164.5 (NCN); 155.3 (NHCO);, 142.5; 129.9, 127.6, 126.5 (Ph ring); 123.1, 122.5 (NCHCHN); 77.4 (C(CH<sub>3</sub>)<sub>3</sub>); 72.7 (CHOH); 56.3 (NCH<sub>2</sub>); 43.6 (NHCH<sub>2</sub>); 37.2 (NCH<sub>3</sub>); 28.5 (C(CH<sub>3</sub>)<sub>3</sub>).

## MALDI AuL20Gly

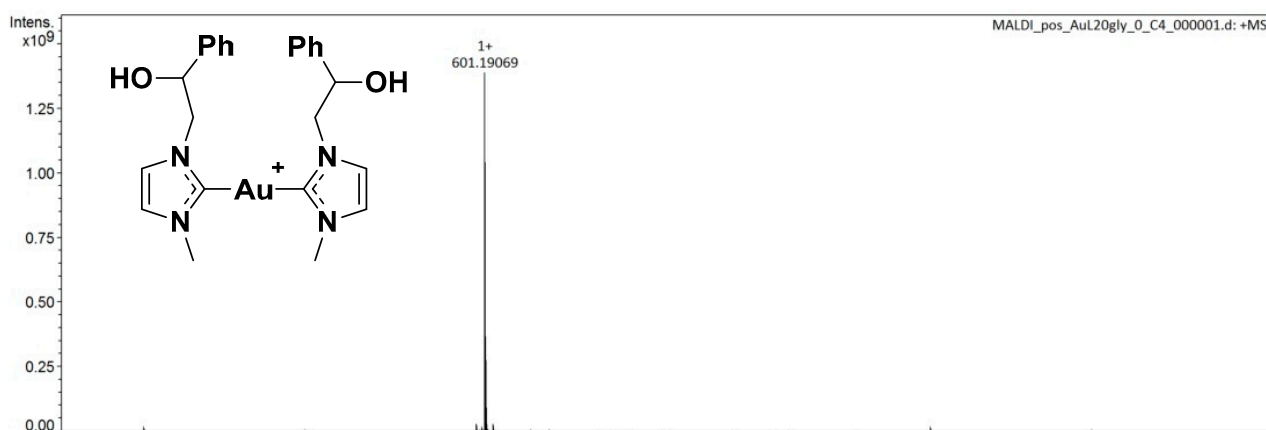

MALDI-MS ( $m/z$ ): 601.19069 attributable to bis-carbene structure  $[\text{C}_{24}\text{H}_{28}\text{AuN}_4\text{O}_2]^+$

Elemental Analysis: theoretical = C: 39.80, H 4.57, Au 34.35, N 7.33, O 13.95; experimental= C 39.75, H 4.82, N 7.30



<sup>1</sup>H-NMR AuL20Phe

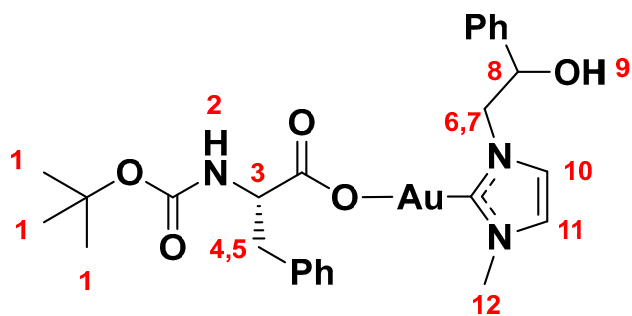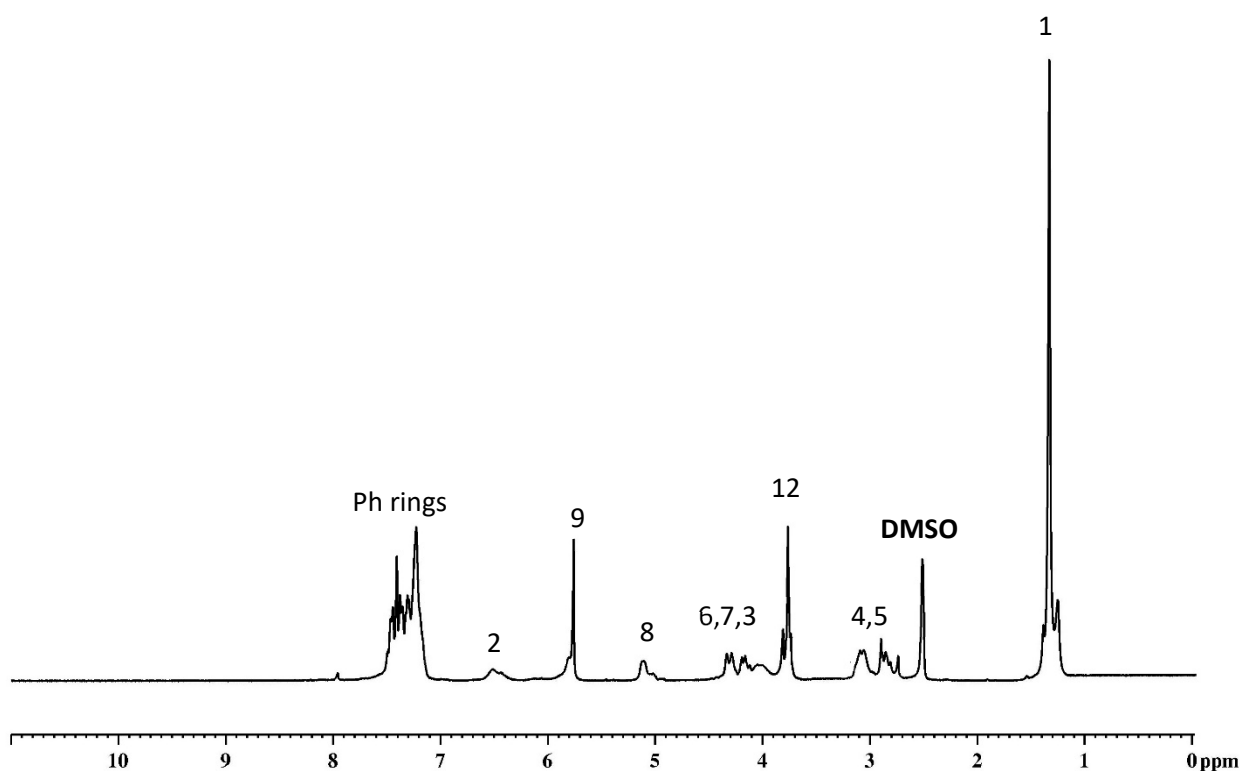

<sup>1</sup>H-NMR (300 MHz, DMSO-d<sub>6</sub>, ppm):  $\delta$  7.40 - 7.17 (m, 12 H, C<sub>6</sub>H<sub>5</sub>CH(OH)CH<sub>2</sub>NCHCHN+Phe:C<sub>6</sub>H<sub>5</sub>); 6.20 (br, 1H, Phe: NH); 5.77 (d, 1H, C<sub>6</sub>H<sub>5</sub>CH(OH)CH<sub>2</sub>N); 5.10 (br, 1H, C<sub>6</sub>H<sub>5</sub>CH(OH)CH<sub>2</sub>N); 4.26-4.16 (dd, J<sub>gem</sub>=14.6 Hz, J<sub>vic</sub>=10.6 Hz, 8.9 Hz, 2H, C<sub>6</sub>H<sub>5</sub>CH(OH)CH<sub>2</sub>N); 4.01 (br, 1H, Phe: CHCH<sub>2</sub>Ph); 3.74 (s, 3H, NCH<sub>3</sub>); 3.09-2.88 (dd, J<sub>gem</sub>=14.0 Hz, J<sub>vic</sub>=9.3 Hz, 8.7 Hz, 2H, Phe: CHCH<sub>2</sub>Ph); 1.39 (s, 9H, Phe: C(CH<sub>3</sub>)<sub>3</sub>).

<sup>13</sup>C-NMR AuL20Phe

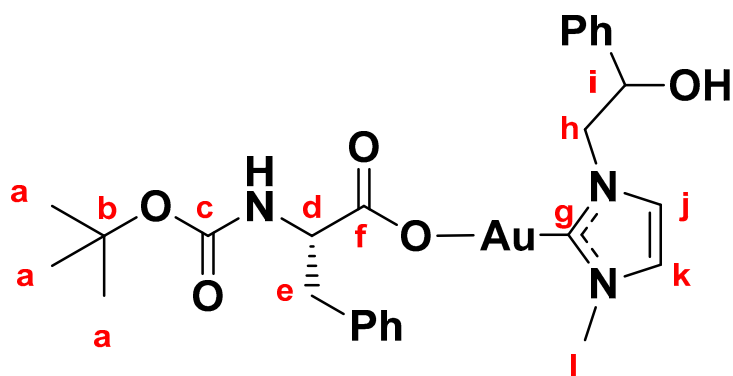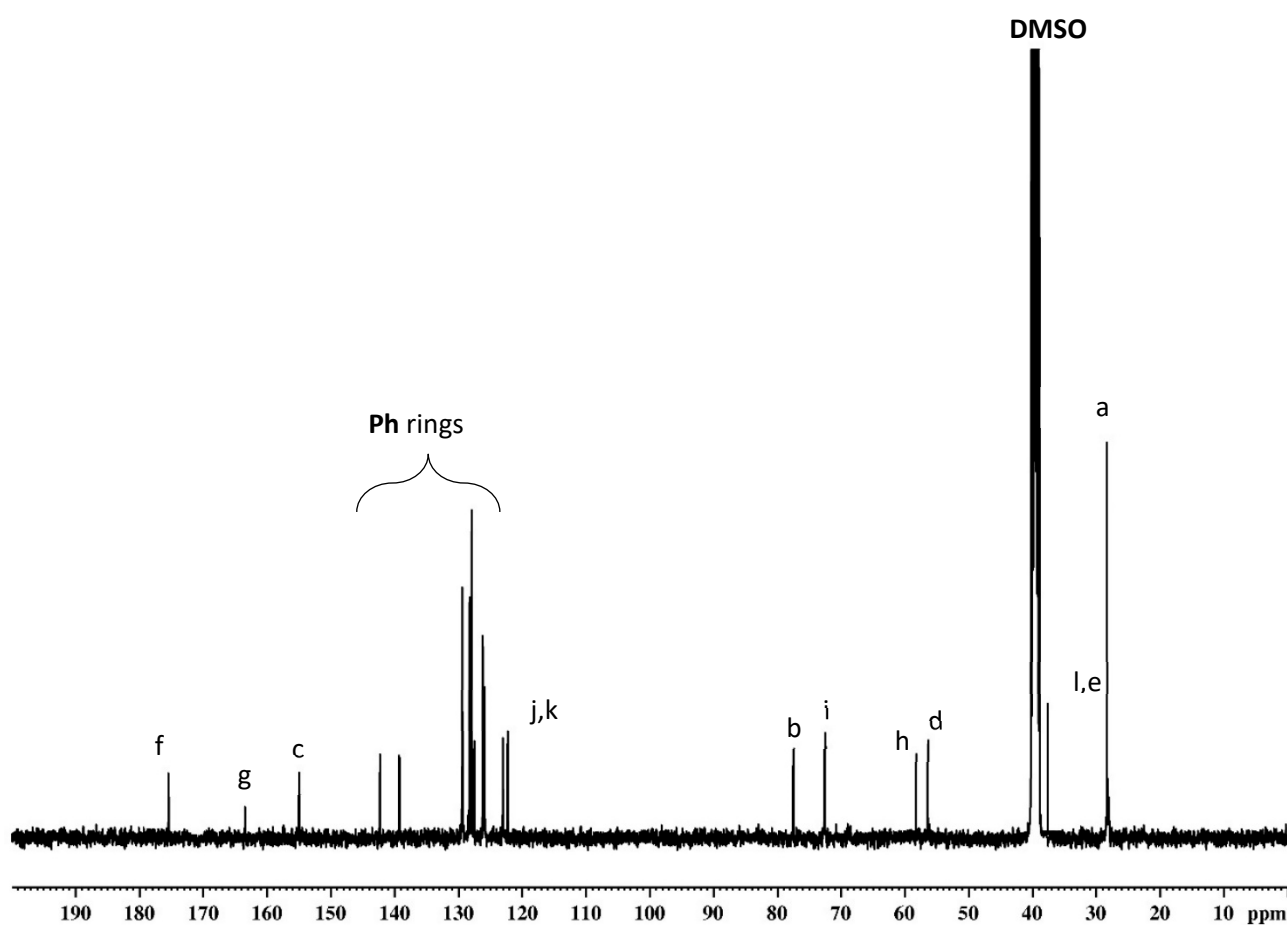

<sup>13</sup>C-NMR (100 MHz, DMSO-d<sub>6</sub>, ppm): δ 175.4 (COOAu); 164.4 (NCN); 154.9 (NHCO); 142.2; 139.2, 129.3, 128.2, 127.8, 127.5, 126.1, 125.8 (**Ph** rings); 124.2, 122.9 (NCHCHN); 77.4 (C(CH<sub>3</sub>)<sub>3</sub>); 72.5 (CHOH); 58.2 (NCH<sub>2</sub>); 56.4 (NHCH); 38.1 (NCH<sub>3</sub>); 37.9 (PhCH<sub>2</sub>); 28.3(C(CH<sub>3</sub>)<sub>3</sub>).

## MALDI AuL20Phe

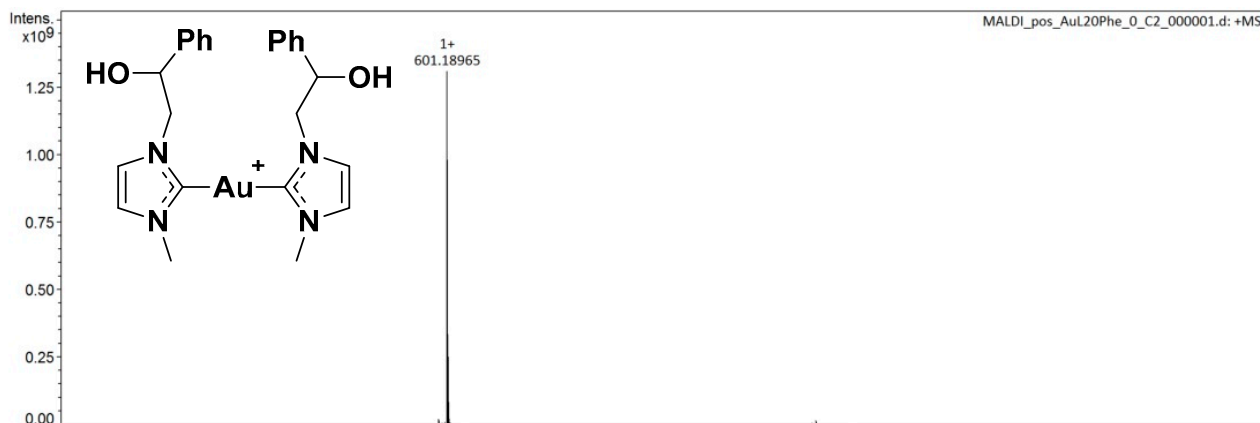

MALDI-MS ( $m/z$ ): 601.18965 attributable to a bis-carbene structure  $[C_{24}H_{28}AuN_4O_2]^+$

Elemental Analysis: theoretical = C: 47.06, H 4.86, Au 29.68, N 6.33, O 12.07; experimental= C 47.05, H 4.86, N 6.40

<sup>1</sup>H-NMR AuM1Gly

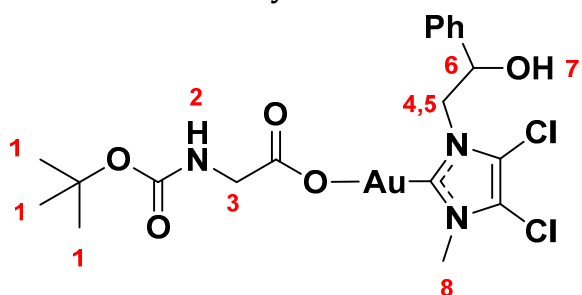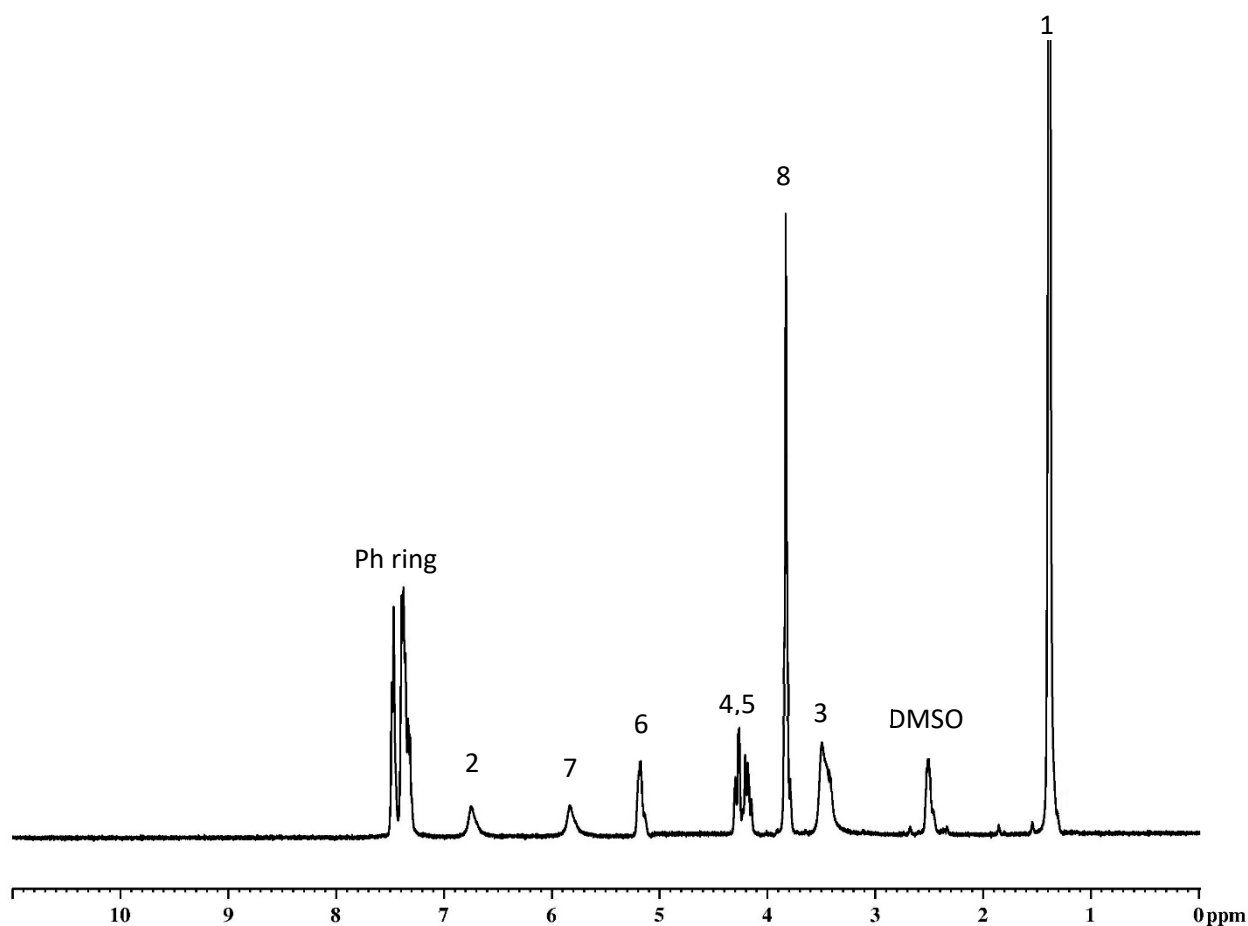

<sup>1</sup>H-NMR (300 MHz, DMSO-d<sub>6</sub>, ppm): δ 7.37-7.35 (m, 5H, C<sub>6</sub>H<sub>5</sub>CH(OH)CH<sub>2</sub>N); 6.84 (br, 1H, Gly: NH); 5.97 (br, 1H; C<sub>6</sub>H<sub>5</sub>CH(OH)CH<sub>2</sub>N); 5.20 (m,  $J_{vic}$  = 10.7 Hz, 8.6 Hz, 1H, C<sub>6</sub>H<sub>5</sub>CH(OH)CH<sub>2</sub>N); 4.25 (m,  $J_{gem}$  = 13.9 Hz,  $J_{vic}$  = 10.7 Hz, 8.6 Hz, 2H, C<sub>6</sub>H<sub>5</sub>CH(OH)CH<sub>2</sub>N); 3.81 (s, 3H, NCH<sub>3</sub>); 3.25 (s, 2H, Gly: NHCH<sub>2</sub>); 1.36 (s, 9H, Gly: C(CH<sub>3</sub>)<sub>3</sub>).

<sup>13</sup>C-NMR AuM1Gly

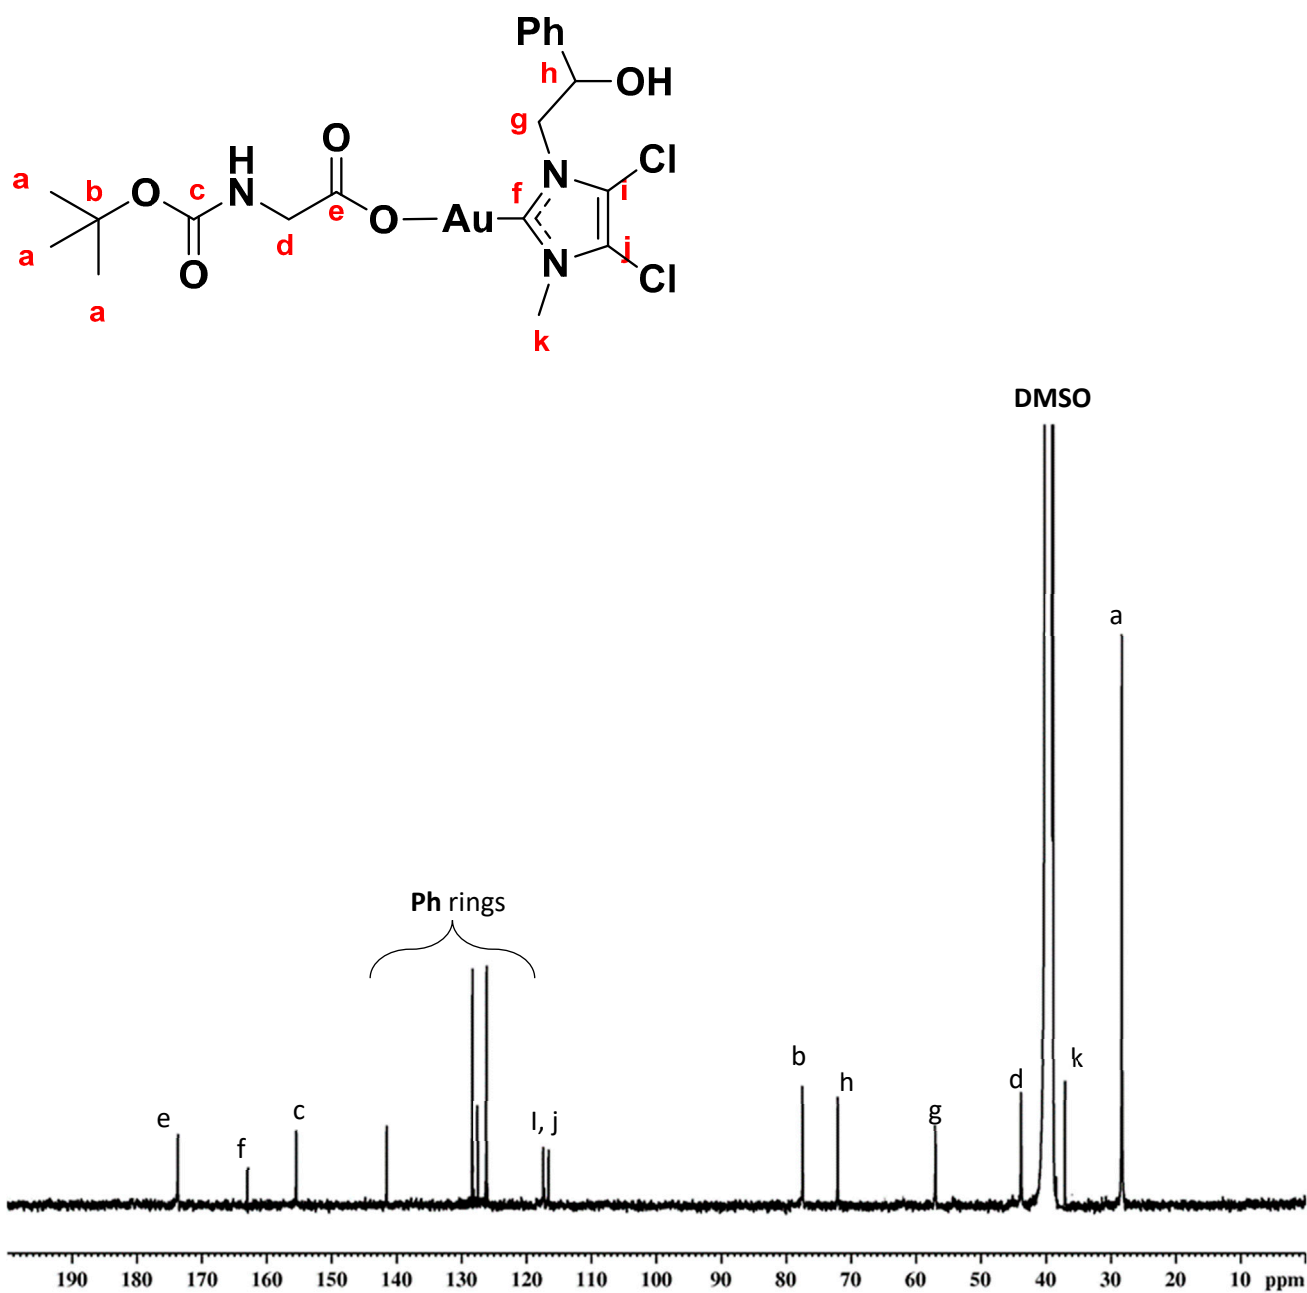

<sup>13</sup>C-NMR (75 MHz, DMSO-d<sub>6</sub>, ppm): δ 173.7 (COOAu); 163.2 (NCN); 155.5 (NHCO); 141.2, 128.8, 127.7, 125.1 (**Ph** rings); 117.4, 116.5 (NCClCClN); 77.5 (C(CH<sub>3</sub>)<sub>3</sub>); 72.1 (CHOH); 56.6 (NCH<sub>2</sub>); 44.1 (NHCH<sub>2</sub>); 37.2 (NCH<sub>3</sub>); 28.3 (C(CH<sub>3</sub>)<sub>3</sub>).

## MALDI AuM1Gly

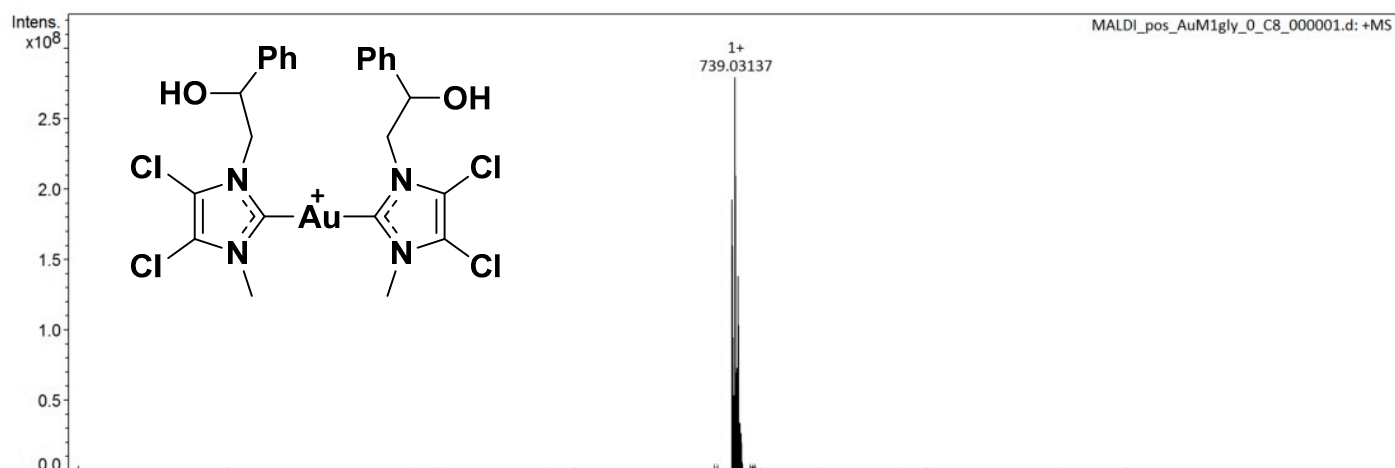

MALDI-MS ( $m/z$ ): 739.03137 attributable to bis-carbene structure  $[C_{24}H_{24}AuCl_4N_4O_2]^+$

Elemental Analysis: theoretical = C: 35.53, H 3.77, Au 30.67, Cl 11.04, N 6.54, O 12.45;  
experimental= C 35.57, H 3.80, Cl 11.10, N 6.58.

<sup>1</sup>H-NMR AuM1Phe

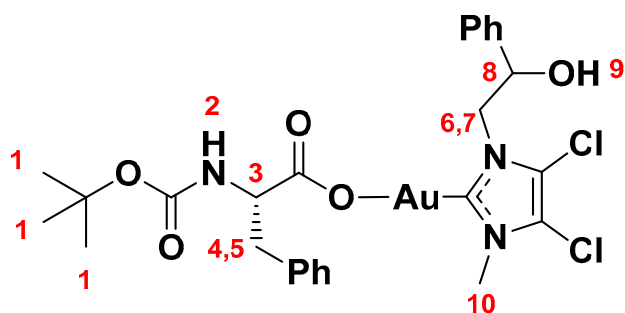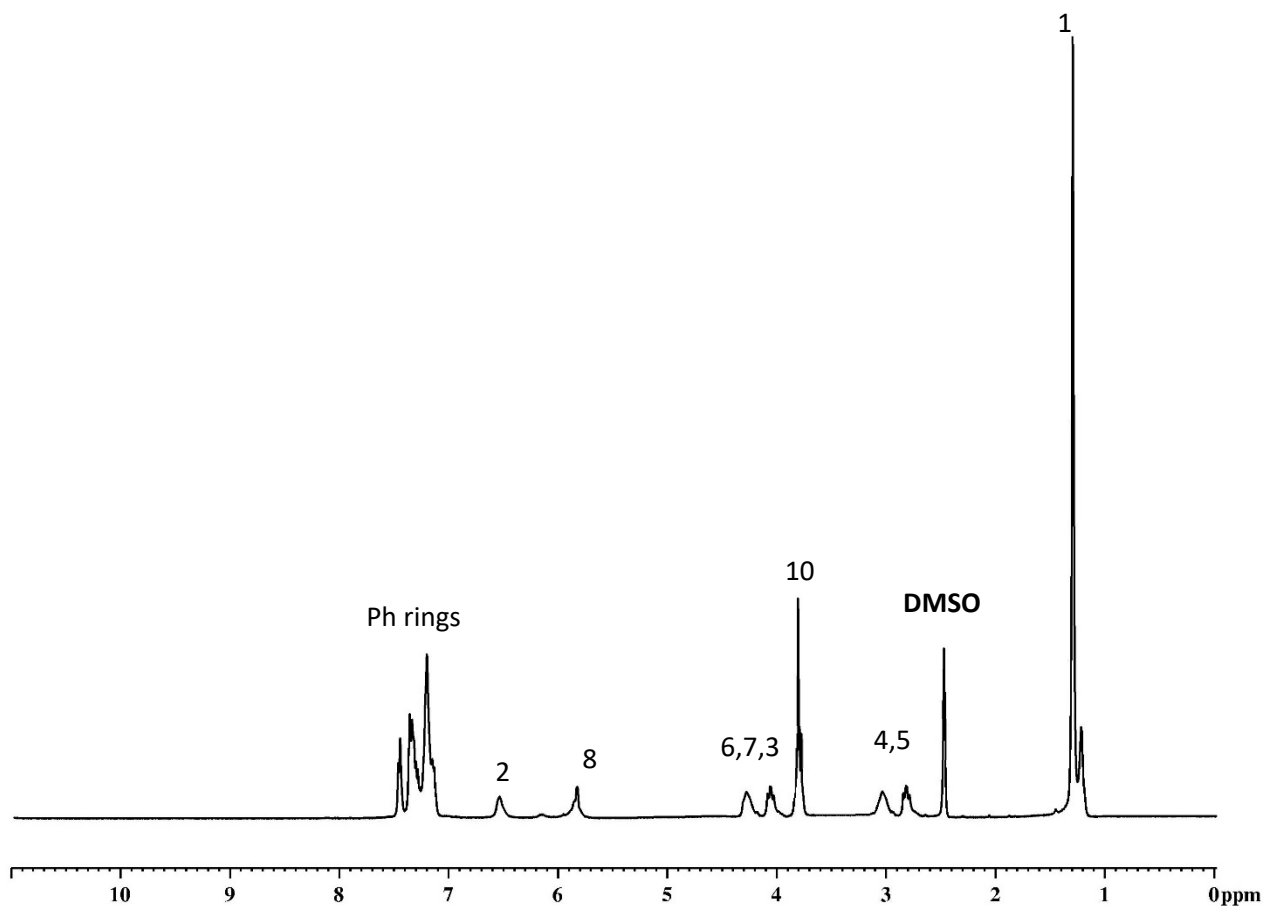

<sup>1</sup>H-NMR (400 MHz, DMSO-d<sub>6</sub>, ppm): δ 7.43-7.20 (m, 10H, C<sub>6</sub>H<sub>5</sub>CH(OH)CH<sub>2</sub>N+Phe:C<sub>6</sub>H<sub>5</sub>); 6.30 (br, 1H, Phe: NH); 5.84 (br, 1H, C<sub>6</sub>H<sub>5</sub>CH(OH)CH<sub>2</sub>N); 4.27 (m, 2H, C<sub>6</sub>H<sub>5</sub>CH(OH)CH<sub>2</sub>N); 4.04 (m, J<sub>vic</sub>= 8.6 Hz, 7.8 Hz, 6.8 Hz, 1H, Phe: CHCH<sub>2</sub>Ph); 3.80 (s, 3H, NCH<sub>3</sub>); 3.11-2.87 (dd, J<sub>gem</sub>=14.8 Hz, J<sub>vic</sub>= 8.6 Hz, 7.8 Hz, 1H, Phe: CHCH<sub>2</sub>Ph); 1.31 (s, 9H, Phe: C(CH<sub>3</sub>)<sub>3</sub>).

<sup>13</sup>C-NMR AuM1Phe

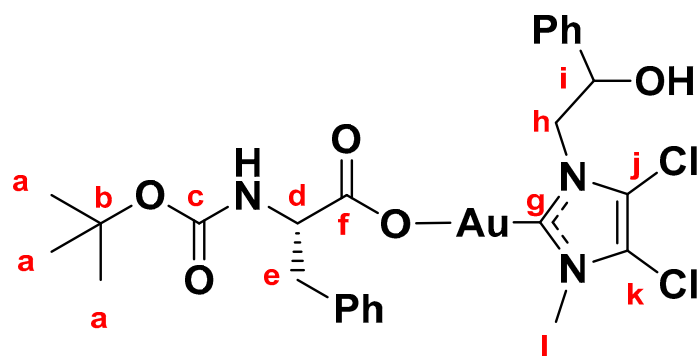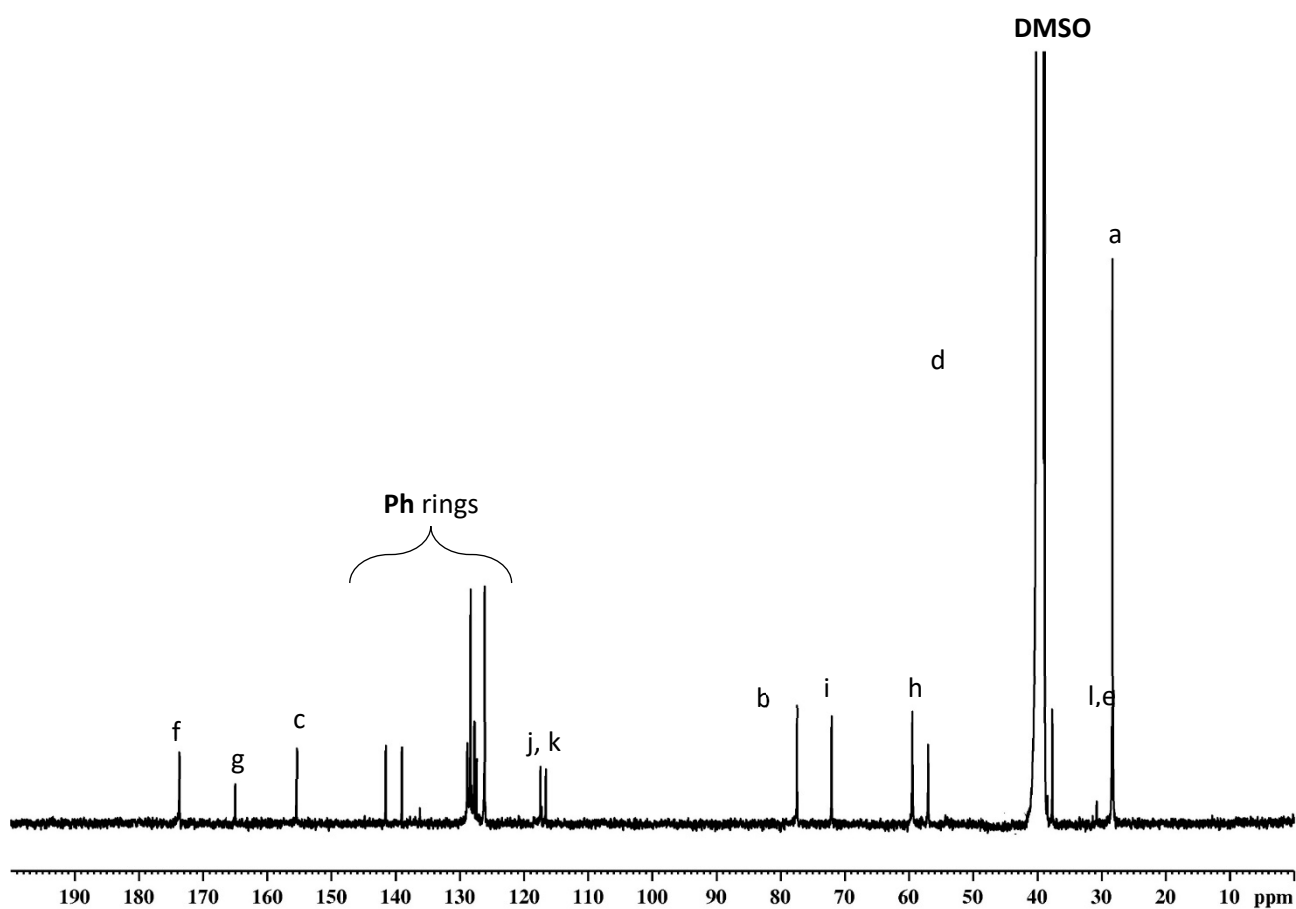

<sup>13</sup>C-NMR (75 MHz, DMSO-d<sub>6</sub>, ppm): δ 175.0 (COOAu); 163.3 (NCN); 155.1 (NHCO); 141.3, 138.8, 129.2, 128.2, 127.9, 125.9 (**Ph** rings); 117.5, 116.5 (NCClCClN); 77.6 (C(CH<sub>3</sub>)<sub>3</sub>); 72.1 (CHOH); 56.6 (NCH<sub>2</sub>); 52.0 (CHNH); 37.2 (NCH<sub>3</sub>); 37.0 (CH<sub>2</sub>Ph); 28.2 (C(CH<sub>3</sub>)<sub>3</sub>).



## MALDI AuM1Phe

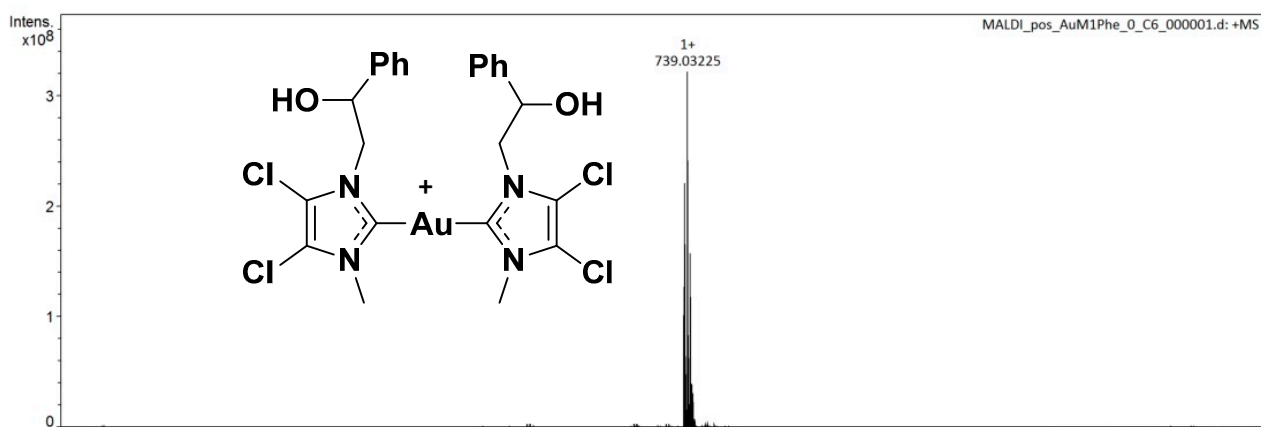

MALDI-MS ( $m/z$ ): 739.03225 attributable to bis-carbene structure  $[C_{24}H_{24}AuCl_4N_4O_2]^+$

Elemental Analysis: theoretical = C: 41.86, H 3.79, Au 27.46, Cl 9.88, N 5.86, O 11.15;  
experimental= C 41.90, H 3.80, Cl 9.87, N 5.90.

### FT-IR Characterization

Fourier transform infrared (FT-IR) spectra were obtained at a resolution of  $2.0\text{ cm}^{-1}$  with a Bruker-Vector 22 FT-IR spectrometer equipped with a deuterated triglycine sulfate (DTGS) detector and Ge/KBr beam splitter. The frequency scale was internally calibrated to  $0.01\text{ cm}^{-1}$  using a HeNe reference laser. Thirty-two scans were signal averaged to reduce spectral noise. The spectra were performed in KBr disks in a frequency range between 4000 and  $450\text{ cm}^{-1}$ .

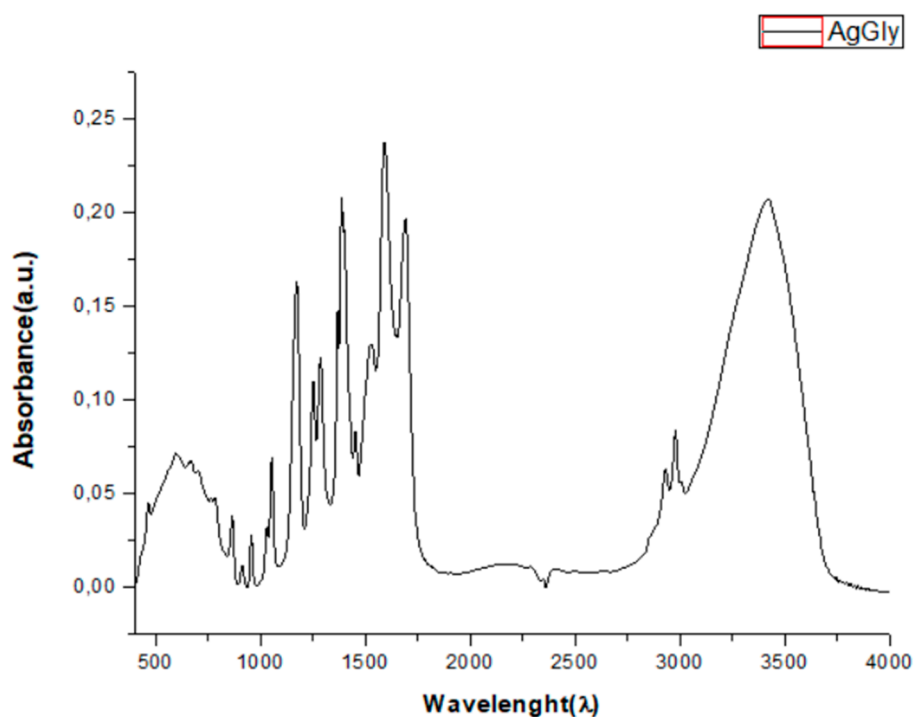

IR (KBr, disk,  $\text{cm}^{-1}$ ):  $\nu$  1691 (C=O); 1591 (C=O amide).

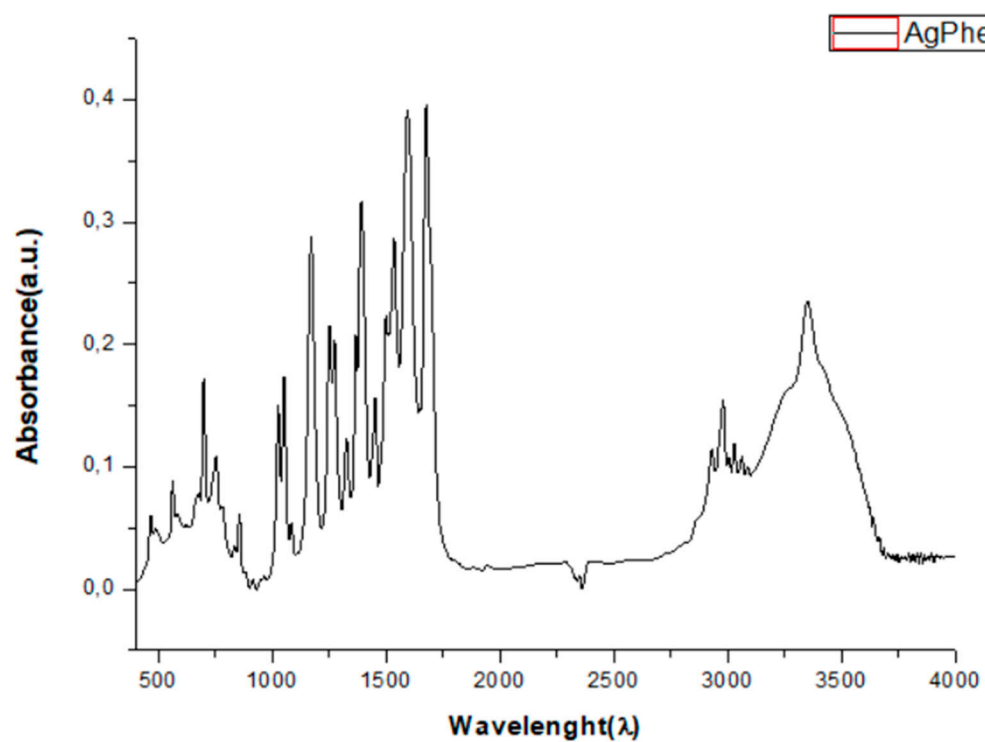

IR (KBr, disk,  $\text{cm}^{-1}$ ):  $\nu$  1676 ( $\text{C}=\text{O}$ ); 1594 ( $\text{C}=\text{O}_{\text{amide}}$ ); 1535 ( $\text{C}=\text{C}_{\text{Ph ring}}$ ).

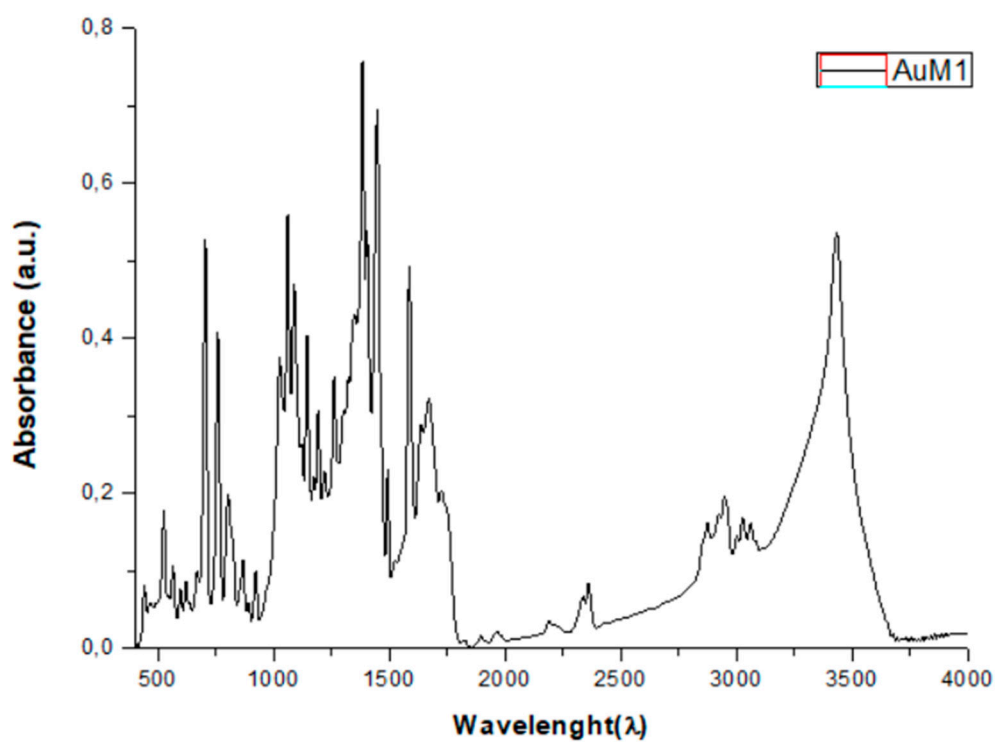

IR (KBr, disk,  $\text{cm}^{-1}$ ):  $\nu$  1586 ( $\text{C}=\text{C}_{\text{Ph ring}}$ ).

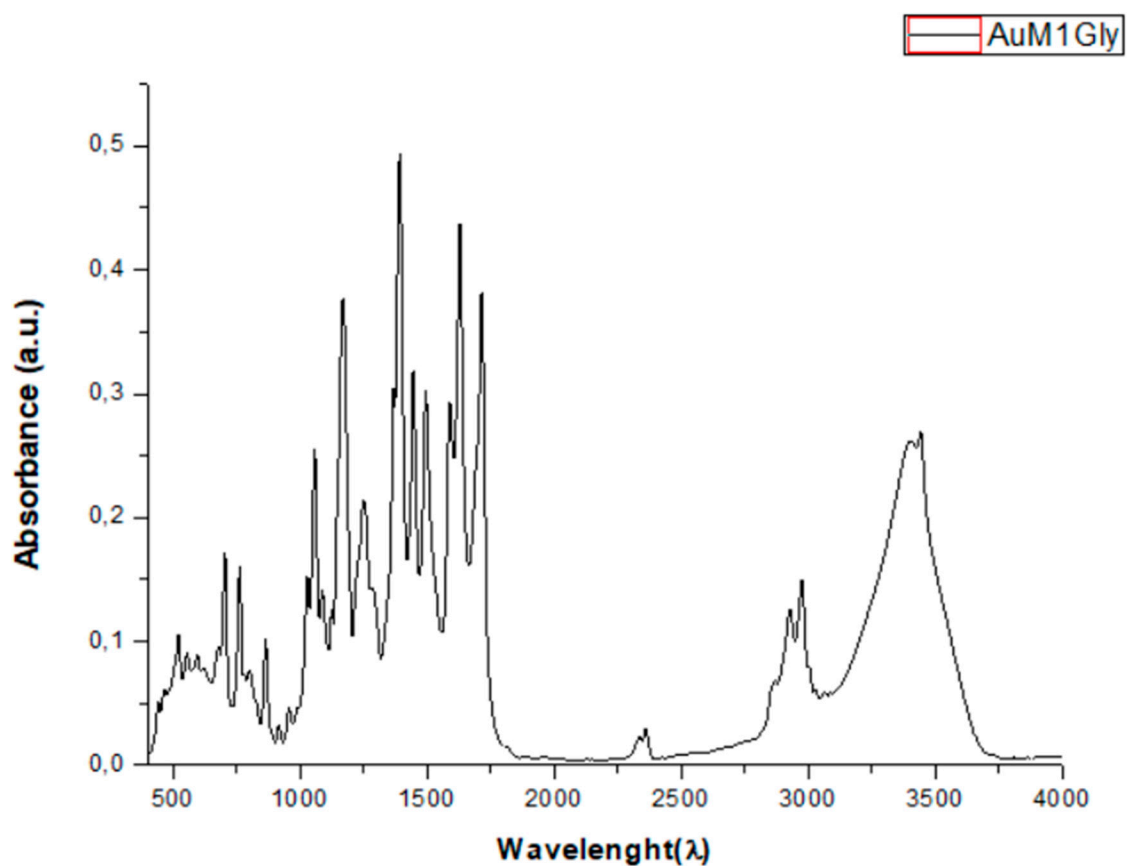

IR (KBr, disk,  $\text{cm}^{-1}$ ):  $\nu$  1715 ( $\text{C}=\text{O}$ ); 1629 ( $\text{C}=\text{O}_{\text{amide}}$ ); 1589 ( $\text{C}=\text{C}_{\text{Ph ring}}$ ).

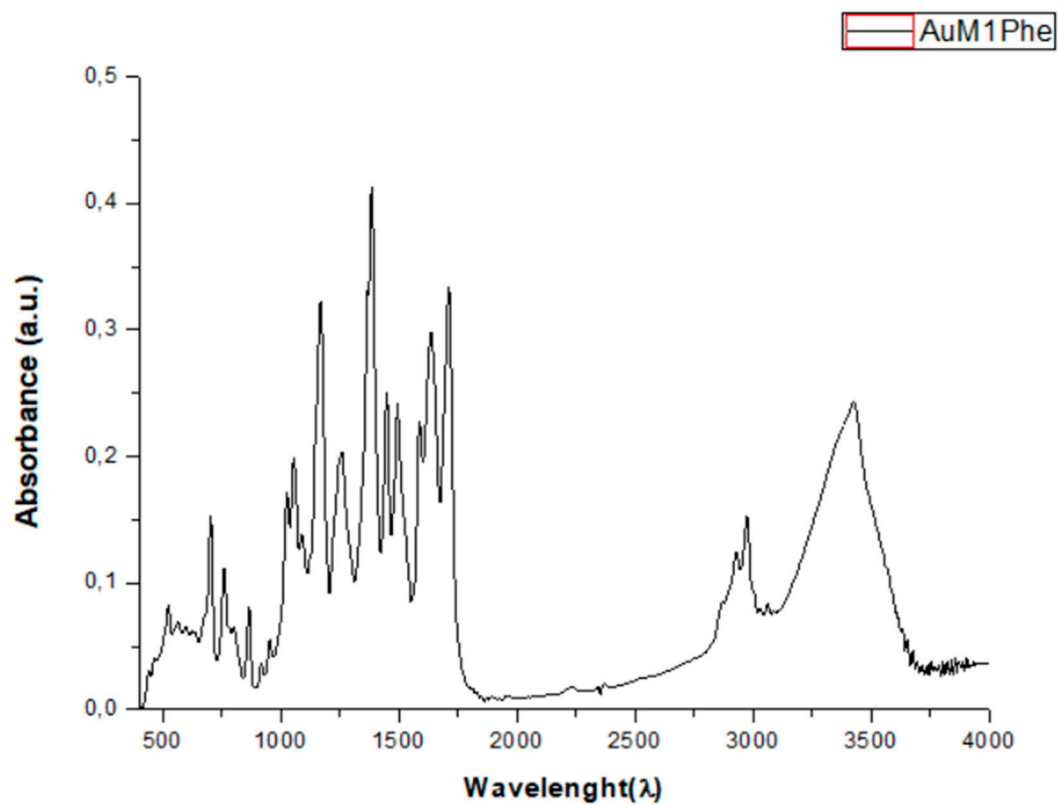

IR (KBr, disk,  $\text{cm}^{-1}$ ):  $\nu$  1712 ( $\text{C}=\text{O}$ ); 1636 ( $\text{C}=\text{O}_{\text{amide}}$ ); 1588 ( $\text{C}=\text{C}_{\text{Ph ring}}$ ).

### Thermal stability of AgM1Gly

Thermal stability of AgM1Gly was determined. Thermogravimetric analysis (TGA) of this complex, reported in **Figure S1**, shows that its decomposition temperature is around 150 °C. This finding was further confirmed by differential scanning calorimetry (DSC) analysis of the sample, see **Figure S2**. Indeed, the thermogram gave an endothermic peak of around 150 °C, probably due to the heat required for the decomposition of the sample. This peak is not observed in a second heating run of the same sample.

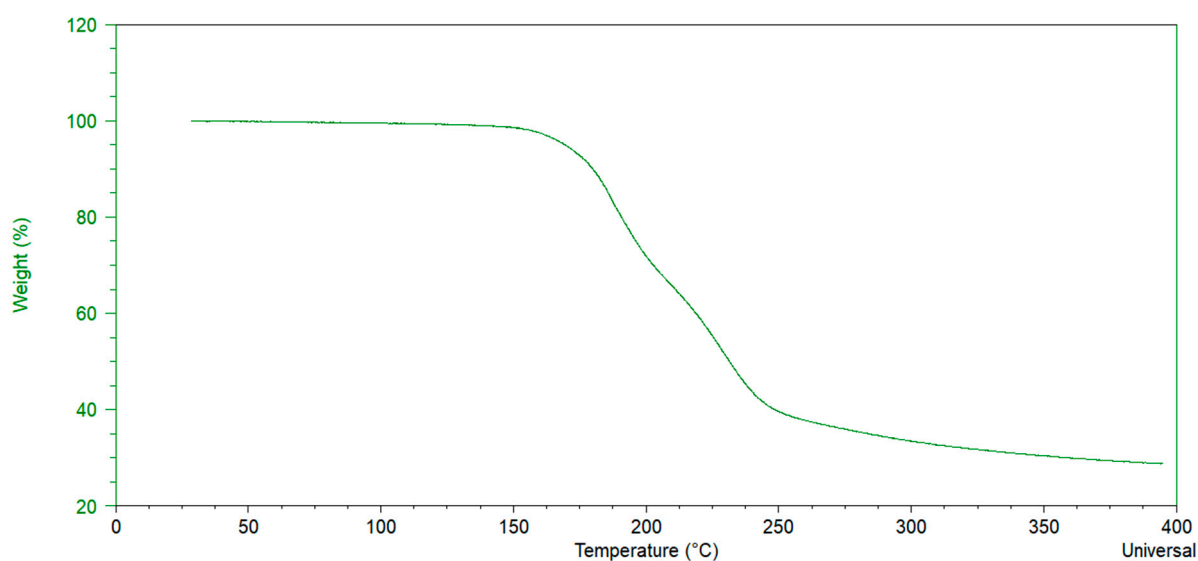

**Figure S1.** Thermogravimetric analysis of AgM1Gly.

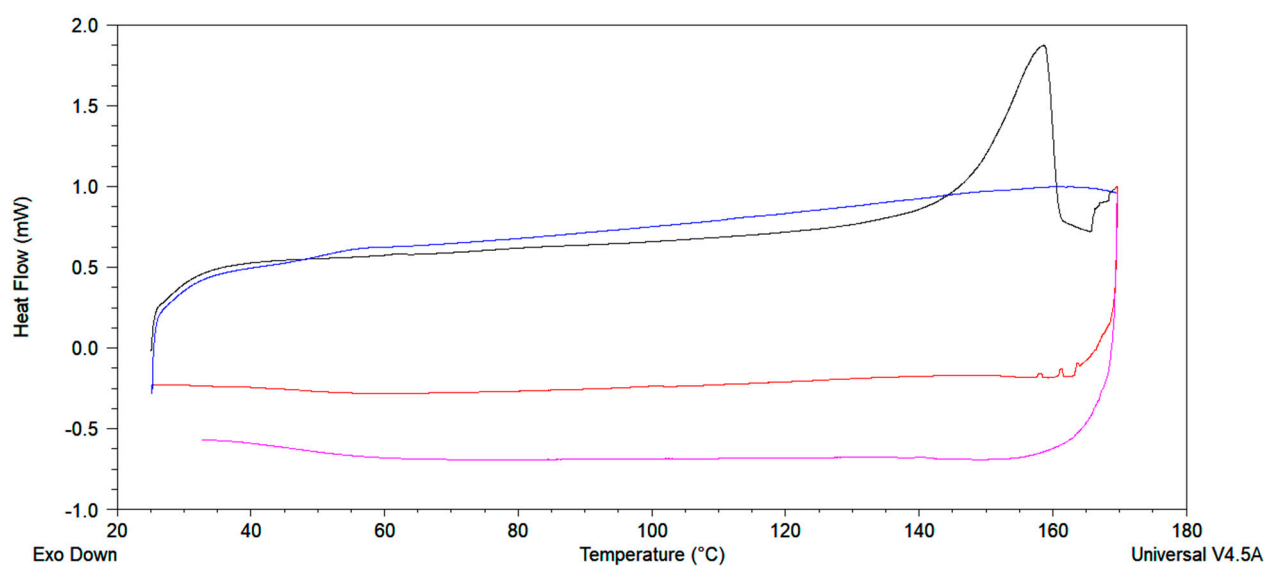

**Figure S2.** Differential Scanning Analysis of AgM1Gly

### Hydrolytic Stability of AgM1Gly, AgPhe, AuM1 and AuM1Phe

The hydrolytic stability of AgM1Gly, AgPhe, AuM1 and AuM1Phe was determined in D<sub>2</sub>O-10% of DMSO-d<sub>6</sub>, following the procedure in ref. [23]. **Figures S3–S6** show the <sup>1</sup>H-NMR spectra of the complexes at time = 0h, 2h, 4h, 24h, 48h and 72h, no changes are observed in time. These preliminary studies can be reasonably extended to all synthesized complexes because they have a similar structure. Thus, it is possible to affirm that these complexes are hydrolytically stable.

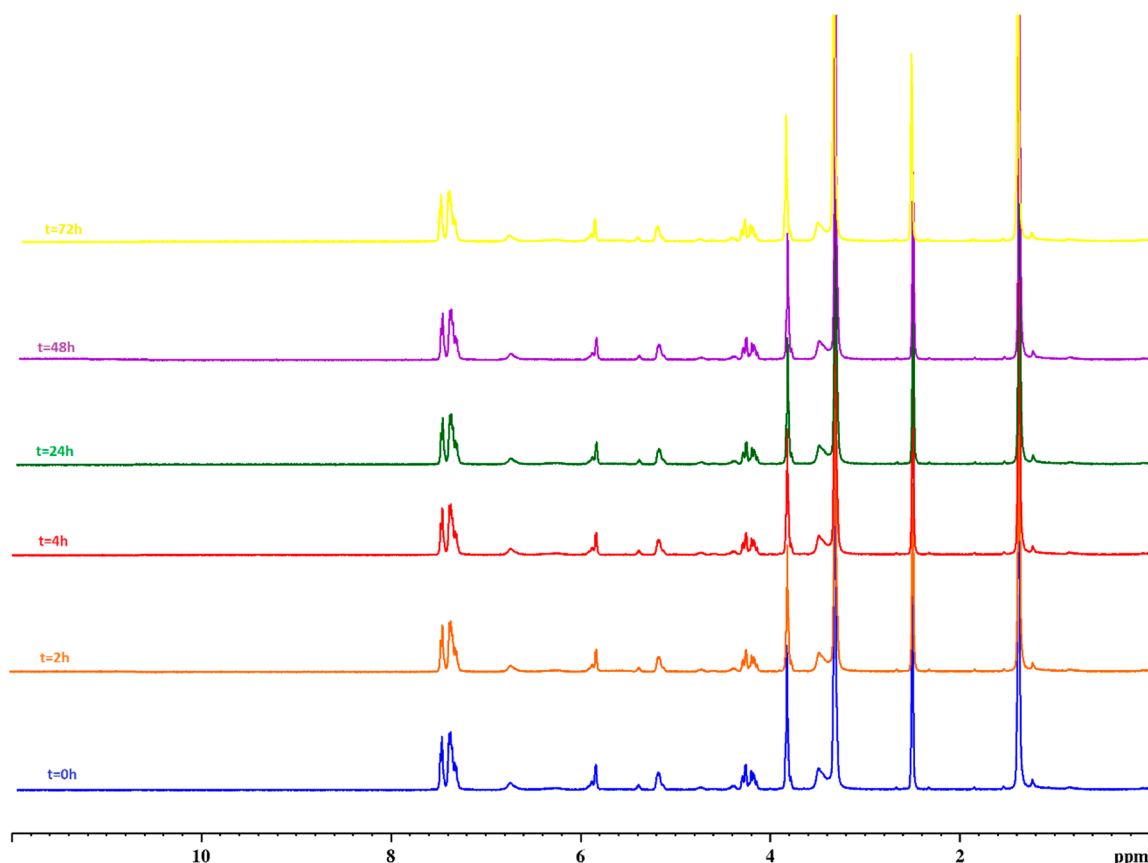

**Figure S3.** Hydrolytic Stability of the complex AgM1Gly.

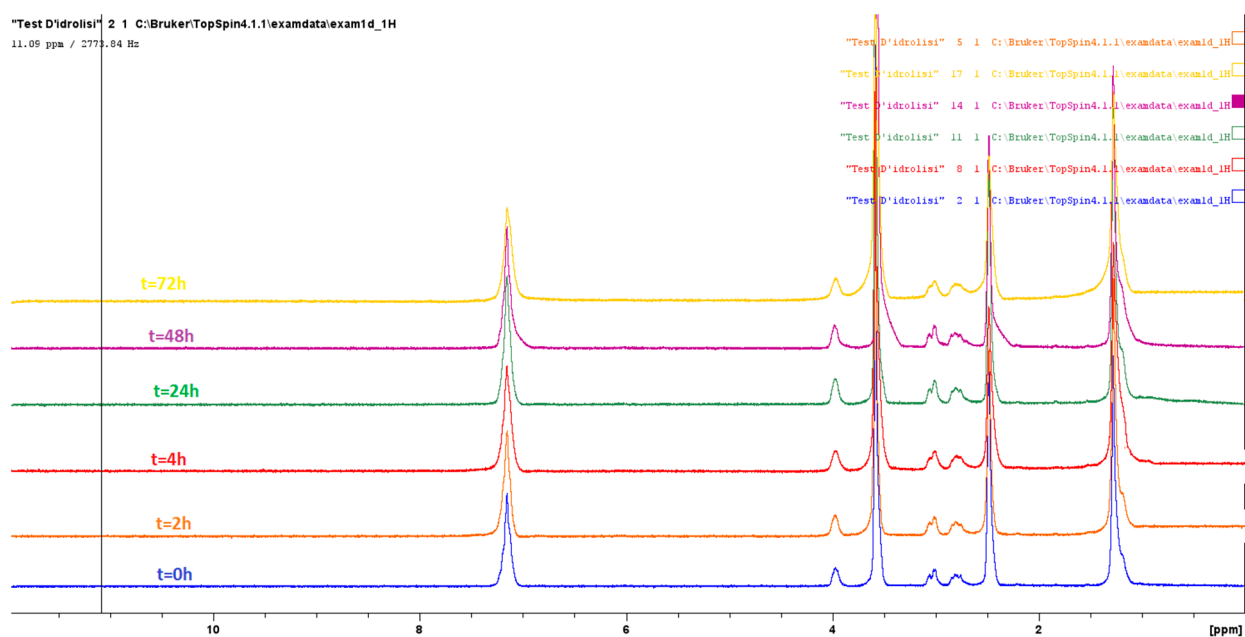

Figure S4 Hydrolytic Stability of the complex AgPhe.

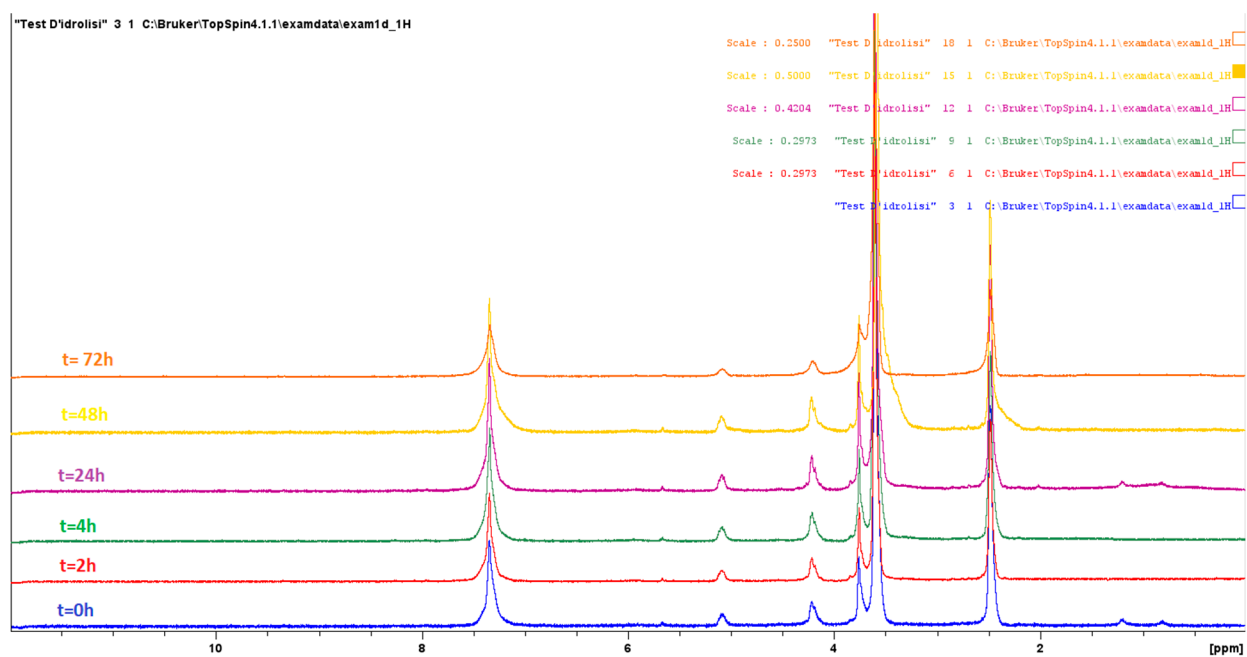

Figure S5 Hydrolytic Stability of the complex AuM1

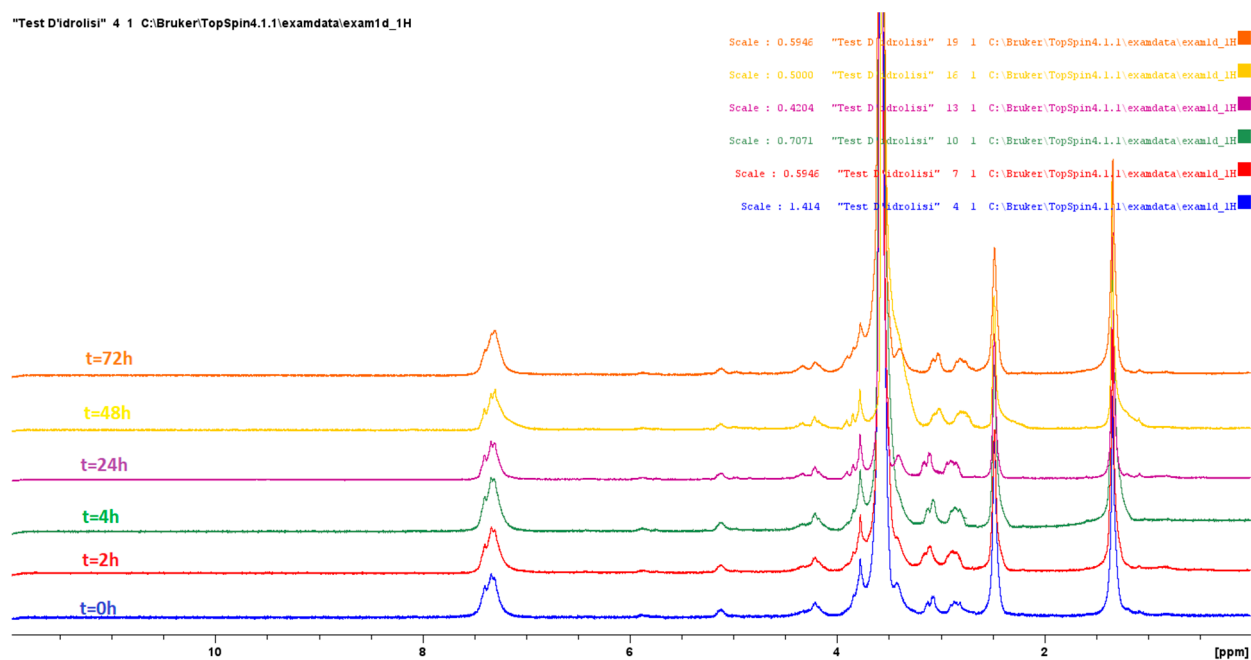

**Figure S6** Hydrolytic Stability of the complex AuM1Phe



## IC<sub>50</sub> values

For the four main complexes (AuM1, AuL20, AgM1 and AgL20) at 20  $\mu\text{M}$  after 24h and 48h of treatment were calculated (see also Table 2 in the manuscript). The related plots were reported in **Figure S7**.

### 24 h

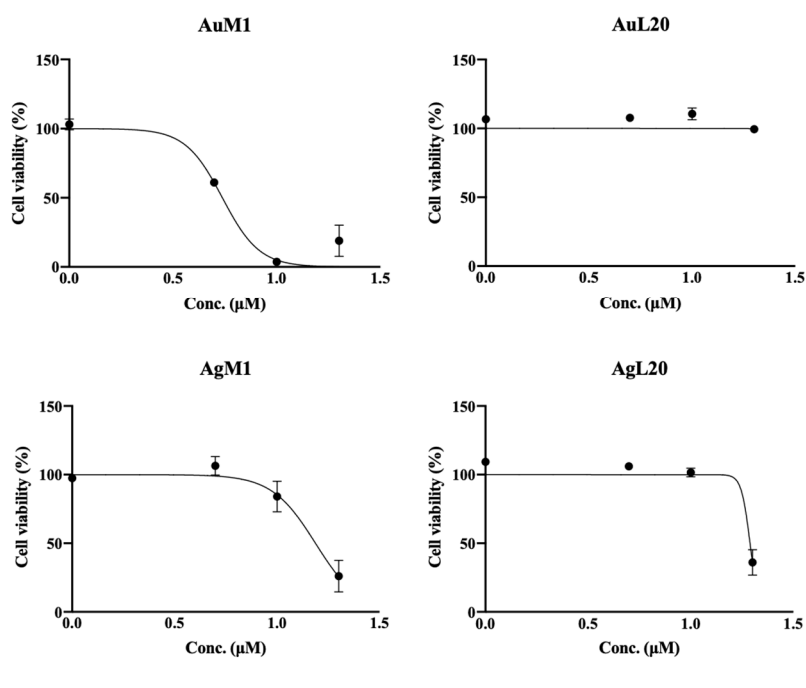

### 48 h

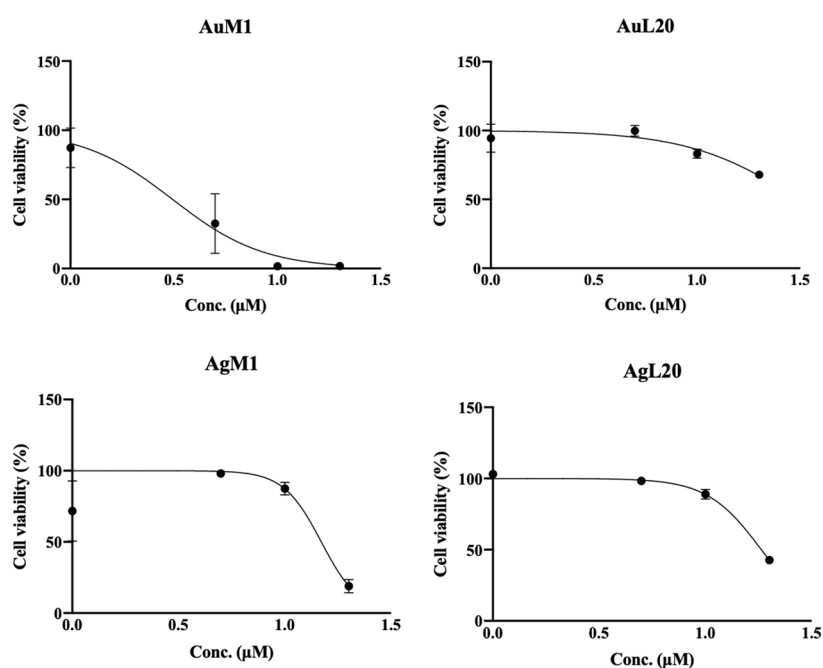

**Figure S7** IC<sub>50</sub> plots for AuM1, AuL20, AgM1 and AgL20.
